# Supplementary material
Source: MDPI journal article supplement (https://www.mdpi.com/2036-7481/12/2/28)
Supplement: s1 [file s1]

## Supplementary Material

**Supplementary Table S2:** The spectrum of APV host diversity. The number of species in which APV has been detected and number of species per order (following Clements et al., 2019) was used to calculate the proportion of APV positive species per order, to test whether proportions significantly varied from the expected level. Significant results are shown in bold.

| Avian order                  | N APV | N Order | Proportion infected with APV | p-value         | Lower CI | Higher CI |
|------------------------------|-------|---------|------------------------------|-----------------|----------|-----------|
| Accipitriformes <sup>1</sup> | 20    | 259     | 0.08                         | <b>9.68E-04</b> | 0.05     | 0.11      |
| Anseriformes                 | 28    | 178     | 0.16                         | <b>3.28E-11</b> | 0.11     | 0.22      |
| Caprimulgiformes             | 2     | 597     | 0.00                         | <b>2.87E-07</b> | 0.00     | 0.01      |
| Charadriiformes              | 17    | 379     | 0.04                         | 3.29E-01        | 0.03     | 0.07      |
| Columbiformes                | 13    | 348     | 0.04                         | 5.57E-01        | 0.02     | 0.07      |
| Coraciiformes                | 0     | 183     | 0.00                         | <b>3.54E-03</b> | 0.00     | 0.02      |
| Cuculiformes                 | 1     | 147     | 0.01                         | 6.81E-02        | 0.00     | 0.04      |
| Galliformes                  | 30    | 295     | 0.10                         | <b>2.25E-07</b> | 0.07     | 0.14      |
| Gruiformes                   | 4     | 192     | 0.02                         | 4.27E-01        | 0.01     | 0.05      |
| Passeriformes                | 161   | 6386    | 0.02                         | <b>1.23E-05</b> | 0.02     | 0.03      |
| Pelecaniformes               | 4     | 114     | 0.03                         | 1.0E+00         | 0.01     | 0.09      |
| Piciformes <sup>1</sup>      | 3     | 432     | 0.01                         | <b>3.25E-04</b> | 0.00     | 0.02      |
| Procellariiformes            | 12    | 138     | 0.08                         | <b>3.38E-03</b> | 0.05     | 0.15      |
| Psittaciformes               | 40    | 387     | 0.10                         | <b>1.55E-09</b> | 0.07     | 0.14      |
| Strigiformes                 | 6     | 234     | 0.02                         | 5.91E-01        | 0.01     | 0.05      |
| Others <sup>2</sup>          | 32    | 452     | 0.07                         | <b>2.52E-04</b> | 0.05     | 0.10      |
| Total                        | 374   | 10721   | 0.03                         |                 |          |           |

### References

Clements, J.F., Schulenberg, T.S., Iliff, M.J., Billerman, S.M., Fredericks, T.A., Sullivan, B.L., Wood, C.L. 2019. *The eBird/Clements Checklist of Birds of the World: v2019*.

<sup>1</sup> We deviate from Clements' treatment of Order in two cases. We consider New World vultures "Cathartiformes" to form part of the order "Accipitriformes", and Puffbirds and Jacamars "Galbuliformes" to belong to the order "Piciformes".

<sup>2</sup> The 24 Orders (following Clements et al., 2019) which contain less than 1% of bird species were grouped together as "Other", to avoid introducing size effect bias to data analysis. Collectively they contain 4.5% of bird species. The full list of bird orders grouped into "Other, from most speciose to least, is: **Bucerotiformes**, **Falconiformes**, Suliformes, Tinamiformes, Trogoniformes, **Otidiformes**, Musophagiformes, **Podicipediformes**, **Ciconiiformes**, **Sphenisciformes**, Pteroclidiformes, **Phoenicopteriformes**, Coliiformes, **Apterygiformes**, Gaviiformes, Casuariiformes, Mesitornithiformes, **Phaethontiformes**, **Struthioniformes**, **Rheiformes**, Eurypygiformes, Cariamiformes, Opisthocomiformes, Leptosomiformes. APV has been detected from all **bold** orders.
