# Supplementary material
Source: MDPI journal article supplement (https://www.mdpi.com/2036-7481/12/2/28)
Supplement: s1 [file s1]

**Supplementary table S1.** Prevalence of avian poxvirus in surveys that are not identified by authors as epizootics or outbreaks.

<sup>1</sup> References are not necessarily the original record of APV detection in a species. Bolte, 1999 and Lapointe 2010 are secondary review sources, which contain references to the primary source material.

| ORDER           | SPECIES                         | REFERENCE <sup>1</sup>                                                                                                                                                                                                                                        |
|-----------------|---------------------------------|---------------------------------------------------------------------------------------------------------------------------------------------------------------------------------------------------------------------------------------------------------------|
| Accipitriformes | <i>Accipiter gentilis</i>       | Bolte, <i>et al.</i> Avian host spectrum of avipoxviruses. <i>Avian Pathol.</i> <b>1999</b> , 28, 415–432                                                                                                                                                     |
| Accipitriformes | <i>Accipiter nisus</i>          | Bolte, <i>et al.</i> Avian host spectrum of avipoxviruses. <i>Avian Pathol.</i> <b>1999</b> , 28, 415–432                                                                                                                                                     |
| Accipitriformes | <i>Aquila adalberti</i>         | Hernández, <i>et al.</i> Avian pox infection in Spanish Imperial eagles ( <i>Aquila adalberti</i> ). <i>Avian Pathol.</i> <b>2001</b> , 30: 91-7.                                                                                                             |
| Accipitriformes | <i>Aquila chrysaetos</i>        | Bolte, <i>et al.</i> Avian host spectrum of avipoxviruses. <i>Avian Pathol.</i> <b>1999</b> , 28, 415–432                                                                                                                                                     |
|                 |                                 | LaPointe, D. Avipoxvirus. In CABI - Invasive Species Compendium. Publisher CAB International. Wallingford, UK, 2010. <a href="http://www.cabi.org/isc">www.cabi.org/isc</a> .                                                                                 |
| Accipitriformes | <i>Aquila heliaca</i>           |                                                                                                                                                                                                                                                               |
| Accipitriformes | <i>Buteo buteo</i>              | Bolte, <i>et al.</i> Avian host spectrum of avipoxviruses. <i>Avian Pathol.</i> <b>1999</b> , 28, 415–432                                                                                                                                                     |
| Accipitriformes | <i>Buteo jamaicensis</i>        | Bolte, <i>et al.</i> Avian host spectrum of avipoxviruses. <i>Avian Pathol.</i> <b>1999</b> , 28, 415–432                                                                                                                                                     |
| Accipitriformes | <i>Buteo lagopus</i>            | Bolte, <i>et al.</i> Avian host spectrum of avipoxviruses. <i>Avian Pathol.</i> <b>1999</b> , 28, 415–432                                                                                                                                                     |
| Accipitriformes | <i>Buteola platyptera</i>       | Bolte, <i>et al.</i> Avian host spectrum of avipoxviruses. <i>Avian Pathol.</i> <b>1999</b> , 28, 415–432                                                                                                                                                     |
|                 |                                 | LaPointe, D. Avipoxvirus. In CABI - Invasive Species Compendium. Publisher CAB International. Wallingford, UK, 2010. <a href="http://www.cabi.org/isc">www.cabi.org/isc</a> .                                                                                 |
| Accipitriformes | <i>Cathartes aura</i>           |                                                                                                                                                                                                                                                               |
| Accipitriformes | <i>Circus cyaneus</i>           | Bolte, <i>et al.</i> Avian host spectrum of avipoxviruses. <i>Avian Pathol.</i> <b>1999</b> , 28, 415–432                                                                                                                                                     |
| Accipitriformes | <i>Circus pygargus</i>          | Bolte, <i>et al.</i> Avian host spectrum of avipoxviruses. <i>Avian Pathol.</i> <b>1999</b> , 28, 415–432                                                                                                                                                     |
| Accipitriformes | <i>Gyps fulvus</i>              | Di Francesco, <i>et al.</i> Evidence of avian poxvirus and papillomavirus infection in <i>Gyps fulvus</i> in Italy. <i>Arch.Virol.</i> <b>2019</b> , 164: 291-5.                                                                                              |
| Accipitriformes | <i>Haliaeetus albicilla</i>     | Saito, <i>et al.</i> Avian poxvirus infection in a white-tailed sea eagle ( <i>Haliaeetus albicilla</i> ) in Japan. <i>Avian Pathol.</i> <b>2009</b> , 38, 485-9.                                                                                             |
|                 |                                 | Stephen, <i>et al.</i> Characterization of an avipoxvirus from a bald eagle ( <i>Haliaeetus leucocephalus</i> ) using novel consensus PCR protocols for the rpo147 and DNA-dependent DNA polymerase genes. <i>J.Avian Med.Surg.</i> <b>2016</b> , 30, 378-85. |
| Accipitriformes | <i>Haliaeetus leucocephalus</i> |                                                                                                                                                                                                                                                               |
| Accipitriformes | <i>Haliaeetus pelagicus</i>     | Saito, <i>et al.</i> Poxvirus infection in a Steller's sea eagle ( <i>Haliaeetus pelagicus</i> ). <i>J.Vet.Med.Sci.</i> <b>2019</b> :18-0566.                                                                                                                 |
| Accipitriformes | <i>Hieraaetus pennatus</i>      | Gyuranecz, <i>et al.</i> Worldwide phylogenetic relationship of avian poxviruses. <i>J.Virol.</i> <b>2013</b> , 87, 4938–4951.                                                                                                                                |
| Accipitriformes | <i>Milvus milvus</i>            | Gyuranecz, <i>et al.</i> Worldwide phylogenetic relationship of avian poxviruses. <i>J.Virol.</i> <b>2013</b> , 87, 4938–4951.                                                                                                                                |
| Accipitriformes | <i>Spilornis cheela</i>         | Chen, <i>et al.</i> Avian pox infection in a free-living crested serpent eagle ( <i>Spilornis cheela</i> ) in southern Taiwan. <i>Avian Dis.</i> <b>2011</b> , 55: 143-6.                                                                                     |
|                 |                                 | LaPointe, D. Avipoxvirus. In CABI - Invasive Species Compendium. Publisher CAB International. Wallingford, UK, 2010. <a href="http://www.cabi.org/isc">www.cabi.org/isc</a> .                                                                                 |
| Accipitriformes | <i>Vultur gryphus</i>           |                                                                                                                                                                                                                                                               |
| Anseriformes    | <i>Aix galericulata</i>         | Bolte, <i>et al.</i> Avian host spectrum of avipoxviruses. <i>Avian Pathol.</i> <b>1999</b> , 28, 415–432                                                                                                                                                     |
|                 |                                 | LaPointe, D. Avipoxvirus. In CABI - Invasive Species Compendium. Publisher CAB International. Wallingford, UK, 2010. <a href="http://www.cabi.org/isc">www.cabi.org/isc</a> .                                                                                 |
| Anseriformes    | <i>Aix sponsa</i>               |                                                                                                                                                                                                                                                               |
| Anseriformes    | <i>Anas clypeata</i>            | Bolte, <i>et al.</i> Avian host spectrum of avipoxviruses. <i>Avian Pathol.</i> <b>1999</b> , 28, 415–432                                                                                                                                                     |
| Anseriformes    | <i>Anas crecca</i>              | Bolte, <i>et al.</i> Avian host spectrum of avipoxviruses. <i>Avian Pathol.</i> <b>1999</b> , 28, 415–432                                                                                                                                                     |
| Anseriformes    | <i>Anas fulvigula</i>           | Gyuranecz, <i>et al.</i> Worldwide phylogenetic relationship of avian poxviruses. <i>J.Virol.</i> <b>2013</b> , 87, 4938–4951.                                                                                                                                |
| Anseriformes    | <i>Anas penelope</i>            | Bolte, <i>et al.</i> Avian host spectrum of avipoxviruses. <i>Avian Pathol.</i> <b>1999</b> , 28, 415–432                                                                                                                                                     |
| Anseriformes    | <i>Anas platyrhynchos</i>       | Bolte, <i>et al.</i> Avian host spectrum of avipoxviruses. <i>Avian Pathol.</i> <b>1999</b> , 28, 415–432                                                                                                                                                     |
| Anseriformes    | <i>Anser anser</i>              | Bolte, <i>et al.</i> Avian host spectrum of avipoxviruses. <i>Avian Pathol.</i> <b>1999</b> , 28, 415–432                                                                                                                                                     |

|                  |                                  |                                                                                                                                                                                                  |
|------------------|----------------------------------|--------------------------------------------------------------------------------------------------------------------------------------------------------------------------------------------------|
| Anseriformes     | <i>Anser anser domesticus</i>    | Bolte, <i>et al.</i> Avian host spectrum of avipoxviruses. <i>Avian Pathol.</i> <b>1999</b> , 28, 415–432                                                                                        |
| Anseriformes     | <i>Anser cygnoides</i>           | Bolte, <i>et al.</i> Avian host spectrum of avipoxviruses. <i>Avian Pathol.</i> <b>1999</b> , 28, 415–432                                                                                        |
| Anseriformes     | <i>Anser fabalis</i>             | Bolte, <i>et al.</i> Avian host spectrum of avipoxviruses. <i>Avian Pathol.</i> <b>1999</b> , 28, 415–432                                                                                        |
| Anseriformes     | <i>Anser indicus</i>             | Bolte, <i>et al.</i> Avian host spectrum of avipoxviruses. <i>Avian Pathol.</i> <b>1999</b> , 28, 415–432                                                                                        |
|                  |                                  | LaPointe, D. Avipoxvirus. In CABI - Invasive Species Compendium. Publisher CAB International. Wallingford, UK, 2010. <a href="http://www.cabi.org/isc">www.cabi.org/isc</a> .                    |
| Anseriformes     | <i>Aythya affinis</i>            | Gyuranecz, <i>et al.</i> Worldwide phylogenetic relationship of avian poxviruses. <i>J.Virol.</i> <b>2013</b> , 87, 4938–4951.                                                                   |
| Anseriformes     | <i>Aythya americana</i>          | Bolte, <i>et al.</i> Avian host spectrum of avipoxviruses. <i>Avian Pathol.</i> <b>1999</b> , 28, 415–432                                                                                        |
| Anseriformes     | <i>Branta canadensis</i>         | Bolte, <i>et al.</i> Avian host spectrum of avipoxviruses. <i>Avian Pathol.</i> <b>1999</b> , 28, 415–432                                                                                        |
| Anseriformes     | <i>Branta sandvicensis</i>       | LaPointe, D. Avipoxvirus. In CABI - Invasive Species Compendium. Publisher CAB International. Wallingford, UK, 2010. <a href="http://www.cabi.org/isc">www.cabi.org/isc</a> .                    |
| Anseriformes     | <i>Bucephala clangula</i>        | Bolte, <i>et al.</i> Avian host spectrum of avipoxviruses. <i>Avian Pathol.</i> <b>1999</b> , 28, 415–432                                                                                        |
| Anseriformes     | <i>Cairina moschata</i>          | LaPointe, D. Avipoxvirus. In CABI - Invasive Species Compendium. Publisher CAB International. Wallingford, UK, 2010. <a href="http://www.cabi.org/isc">www.cabi.org/isc</a> .                    |
| Anseriformes     | <i>Cereopsis novaehollandiae</i> | Bolte, <i>et al.</i> Avian host spectrum of avipoxviruses. <i>Avian Pathol.</i> <b>1999</b> , 28, 415–432                                                                                        |
| Anseriformes     | <i>Cygnus atrata</i>             | Gyuranecz, <i>et al.</i> Worldwide phylogenetic relationship of avian poxviruses. <i>J.Virol.</i> <b>2013</b> , 87, 4938–4951.                                                                   |
| Anseriformes     | <i>Cygnus buccinator</i>         | Bolte, <i>et al.</i> Avian host spectrum of avipoxviruses. <i>Avian Pathol.</i> <b>1999</b> , 28, 415–432                                                                                        |
| Anseriformes     | <i>Cygnus columbianus</i>        | Bolte, <i>et al.</i> Avian host spectrum of avipoxviruses. <i>Avian Pathol.</i> <b>1999</b> , 28, 415–432                                                                                        |
| Anseriformes     | <i>Cygnus olor</i>               | Braga <i>et al.</i> Avipoxvirus detected in tumor-like lesions in a white-faced whistling duck ( <i>Dendrocygna viduata</i> ). <i>Pesquisa Veterinária Brasileira.</i> <b>2020</b> , 40, 818-23. |
| Anseriformes     | <i>Dendrocygna viduata</i>       | Bolte, <i>et al.</i> Avian host spectrum of avipoxviruses. <i>Avian Pathol.</i> <b>1999</b> , 28, 415–432                                                                                        |
| Anseriformes     | <i>Melanitta nigra</i>           | Gyuranecz, <i>et al.</i> Worldwide phylogenetic relationship of avian poxviruses. <i>J.Virol.</i> <b>2013</b> , 87, 4938–4951.                                                                   |
| Anseriformes     | <i>Spatula discors</i>           | Bolte, <i>et al.</i> Avian host spectrum of avipoxviruses. <i>Avian Pathol.</i> <b>1999</b> , 28, 415–432                                                                                        |
| Anseriformes     | <i>Tadorna ferruginea</i>        | Ha, <i>et al.</i> The phylogenetic analysis of avipoxvirus in New Zealand. <i>Vet microbiol.</i> <b>2011</b> , 12: 80-7.                                                                         |
| Anseriformes     | <i>Tadorna variegata</i>         | Ha, <i>et al.</i> Avipoxvirus infections in brown kiwi ( <i>Apteryx mantelli</i> ). <i>N.Z.Vet.J.</i> <b>2012</b> , 61: 49-52.                                                                   |
| Apterygiiformes  | <i>Apteryx mantelli</i>          | Bolte, <i>et al.</i> Avian host spectrum of avipoxviruses. <i>Avian Pathol.</i> <b>1999</b> , 28, 415–432                                                                                        |
| Bucerotiformes   | <i>Phoeniculus purpureus</i>     | Godoy, <i>et al.</i> Characterization of avian poxvirus in Anna's Hummingbird ( <i>Calypste anna</i> ) in California, USA. <i>J.Wildlife Dis.</i> <b>2013</b> , 49, 978-85.                      |
| Caprimulgiformes | <i>Calypste anna</i>             | Bolte, <i>et al.</i> Avian host spectrum of avipoxviruses. <i>Avian Pathol.</i> <b>1999</b> , 28, 415–432                                                                                        |
| Caprimulgiformes | <i>Chaetura pelagica</i>         | Ha, <i>et al.</i> The phylogenetic analysis of avipoxvirus in New Zealand. <i>Vet microbiol.</i> <b>2011</b> , 12: 80-7.                                                                         |
| Charadriiformes  | <i>Anarhynchus frontalis</i>     | Bolte, <i>et al.</i> Avian host spectrum of avipoxviruses. <i>Avian Pathol.</i> <b>1999</b> , 28, 415–432                                                                                        |
| Charadriiformes  | <i>Anous stolidus</i>            | Bolte, <i>et al.</i> Avian host spectrum of avipoxviruses. <i>Avian Pathol.</i> <b>1999</b> , 28, 415–432                                                                                        |
| Charadriiformes  | <i>Anous tenuirostris</i>        | LaPointe, D. Avipoxvirus. In CABI - Invasive Species Compendium. Publisher CAB International. Wallingford, UK, 2010. <a href="http://www.cabi.org/isc">www.cabi.org/isc</a> .                    |
| Charadriiformes  | <i>Burhinus oedipnemus</i>       |                                                                                                                                                                                                  |

|                 |                                  |                                                                                                                                                                                        |
|-----------------|----------------------------------|----------------------------------------------------------------------------------------------------------------------------------------------------------------------------------------|
| Charadriiformes | <i>Calidris alba</i>             | LaPointe, D. Avipoxvirus. In CABI - Invasive Species Compendium. Publisher CAB International. Wallingford, UK, 2010. <a href="http://www.cabi.org/isc">www.cabi.org/isc</a> .          |
| Charadriiformes | <i>Calidris alpina</i>           | Bolte, <i>et al.</i> Avian host spectrum of avipoxviruses. <i>Avian Pathol.</i> <b>1999</b> , 28, 415–432                                                                              |
| Charadriiformes | <i>Haematopus ostralegus</i>     | Bolte, <i>et al.</i> Avian host spectrum of avipoxviruses. <i>Avian Pathol.</i> <b>1999</b> , 28, 415–432                                                                              |
| Charadriiformes | <i>Haematopus unicolor</i>       | Ha, <i>et al.</i> The phylogenetic analysis of avipoxvirus in New Zealand. <i>Vet microbiol.</i> <b>2011</b> , 12: 80-7.                                                               |
| Charadriiformes | <i>Larus argentatus</i>          | Bolte, <i>et al.</i> Avian host spectrum of avipoxviruses. <i>Avian Pathol.</i> <b>1999</b> , 28, 415–432                                                                              |
| Charadriiformes | <i>Larus canus</i>               | Bolte, <i>et al.</i> Avian host spectrum of avipoxviruses. <i>Avian Pathol.</i> <b>1999</b> , 28, 415–432                                                                              |
| Charadriiformes | <i>Numenius arquata</i>          | Bolte, <i>et al.</i> Avian host spectrum of avipoxviruses. <i>Avian Pathol.</i> <b>1999</b> , 28, 415–432                                                                              |
| Charadriiformes | <i>Pluvialis apricaria</i>       | Bolte, <i>et al.</i> Avian host spectrum of avipoxviruses. <i>Avian Pathol.</i> <b>1999</b> , 28, 415–432                                                                              |
| Charadriiformes | <i>Sterna fuscata</i>            | Bolte, <i>et al.</i> Avian host spectrum of avipoxviruses. <i>Avian Pathol.</i> <b>1999</b> , 28, 415–432                                                                              |
| Charadriiformes | <i>Thalasseus maximus</i>        | Bolte, <i>et al.</i> Avian host spectrum of avipoxviruses. <i>Avian Pathol.</i> <b>1999</b> , 28, 415–432                                                                              |
| Charadriiformes | <i>Thinornis novaeseelandiae</i> | Ha, <i>et al.</i> The phylogenetic analysis of avipoxvirus in New Zealand. <i>Vet microbiol.</i> <b>2011</b> , 12: 80-7.                                                               |
| Charadriiformes | <i>Uria aalge</i>                | Bolte, <i>et al.</i> Avian host spectrum of avipoxviruses. <i>Avian Pathol.</i> <b>1999</b> , 28, 415–432                                                                              |
| Charadriiformes | <i>Vanellus vanellus</i>         | Bolte, <i>et al.</i> Avian host spectrum of avipoxviruses. <i>Avian Pathol.</i> <b>1999</b> , 28, 415–432                                                                              |
| Ciconiiformes   | <i>Ardea herodias</i>            | LaPointe, D. Avipoxvirus. In CABI - Invasive Species Compendium. Publisher CAB International. Wallingford, UK, 2010. <a href="http://www.cabi.org/isc">www.cabi.org/isc</a> .          |
| Ciconiiformes   | <i>Ciconia ciconia</i>           | Bolte, <i>et al.</i> Avian host spectrum of avipoxviruses. <i>Avian Pathol.</i> <b>1999</b> , 28, 415–432                                                                              |
| Ciconiiformes   | <i>Ciconia nigra</i>             | Bolte, <i>et al.</i> Avian host spectrum of avipoxviruses. <i>Avian Pathol.</i> <b>1999</b> , 28, 415–432                                                                              |
| Ciconiiformes   | <i>Egretta rufescens</i>         | LaPointe, D. Avipoxvirus. In CABI - Invasive Species Compendium. Publisher CAB International. Wallingford, UK, 2010. <a href="http://www.cabi.org/isc">www.cabi.org/isc</a> .          |
| Ciconiiformes   | <i>Egretta thula</i>             | LaPointe, D. Avipoxvirus. In CABI - Invasive Species Compendium. Publisher CAB International. Wallingford, UK, 2010. <a href="http://www.cabi.org/isc">www.cabi.org/isc</a> .          |
| Ciconiiformes   | <i>Platalea ajaja</i>            | LaPointe, D. Avipoxvirus. In CABI - Invasive Species Compendium. Publisher CAB International. Wallingford, UK, 2010. <a href="http://www.cabi.org/isc">www.cabi.org/isc</a> .          |
| Columbiformes   | <i>Columba guinea</i>            | Bwala <i>et al.</i> Avian poxvirus in a free-range juvenile speckled (rock) pigeon ( <i>Columba guinea</i> ). <i>JSAVA.</i> <b>2015</b> , 86: 01-4.                                    |
| Columbiformes   | <i>Columba junoniae</i>          | LaPointe, D. Avipoxvirus. In CABI - Invasive Species Compendium. Publisher CAB International. Wallingford, UK, 2010. <a href="http://www.cabi.org/isc">www.cabi.org/isc</a> .          |
| Columbiformes   | <i>Columba livia</i>             | Bolte, <i>et al.</i> Avian host spectrum of avipoxviruses. <i>Avian Pathol.</i> <b>1999</b> , 28, 415–432                                                                              |
| Columbiformes   | <i>Columba palumbus</i>          | Bolte, <i>et al.</i> Avian host spectrum of avipoxviruses. <i>Avian Pathol.</i> <b>1999</b> , 28, 415–432                                                                              |
| Columbiformes   | <i>Ducula oceanica</i>           | Ha, <i>et al.</i> The phylogenetic analysis of avipoxvirus in New Zealand. <i>Vet microbiol.</i> <b>2011</b> , 12: 80-7.                                                               |
| Columbiformes   | <i>Hemiphaga novaeseelandiae</i> | Ha, <i>et al.</i> The phylogenetic analysis of avipoxvirus in New Zealand. <i>Vet microbiol.</i> <b>2011</b> , 12: 80-7.                                                               |
| Columbiformes   | <i>Leptotila rufaxila</i>        | Pérez-Tris <i>et al.</i> A multiplex PCR for detection of poxvirus and papillomavirus in cutaneous warts from live birds and museum skins. <i>Avian Dis.</i> <b>2011</b> , 55: 545-53. |
| Columbiformes   | <i>Patagioenas araucana</i>      | Bolte, <i>et al.</i> Avian host spectrum of avipoxviruses. <i>Avian Pathol.</i> <b>1999</b> , 28, 415–432                                                                              |

|               |                                                                       |                                                                                                                                                                                                                                                                                                                         |
|---------------|-----------------------------------------------------------------------|-------------------------------------------------------------------------------------------------------------------------------------------------------------------------------------------------------------------------------------------------------------------------------------------------------------------------|
| Columbiformes | <i>Stigmatopelia senegalensis</i> =<br><i>Spilopelia senegalensis</i> | Pawar, <i>et al.</i> Avian pox infection in different wild birds in India. <i>Eur.J.Wildlife</i> . <b>2011</b> , 57, 785-93.<br>Pérez-Tris <i>et al.</i> A multiplex PCR for detection of poxvirus and papillomavirus in cutaneous warts from live birds and museum skins. <i>Avian Dis</i> . <b>2011</b> , 55: 545-53. |
| Columbiformes | <i>Streptopelia capicola</i>                                          | Bolte, <i>et al.</i> Avian host spectrum of avipoxviruses. <i>Avian Pathol</i> . <b>1999</b> , 28, 415–432                                                                                                                                                                                                              |
| Columbiformes | <i>Streptopelia decaocto</i>                                          | Lee, <i>et al.</i> Molecular epidemiology of avian poxvirus in the oriental turtle dove ( <i>Streptopelia orientalis</i> ) and the biting midge ( <i>Culicoides arakawae</i> ) in the Republic of Korea. <i>J.Wildlife Dis</i> . <b>2017</b> , 53:749-60.                                                               |
| Columbiformes | <i>Streptopelia orientalis</i>                                        | Mete, <i>et al.</i> Atypical poxvirus lesions in two Galapagos doves ( <i>Nesopelia g. galapagoensis</i> ). <i>Avian Pathol</i> . <b>2001</b> , 30, 159-162.                                                                                                                                                            |
| Columbiformes | <i>Zenaida galapagoensis</i>                                          | Bolte, <i>et al.</i> Avian host spectrum of avipoxviruses. <i>Avian Pathol</i> . <b>1999</b> , 28, 415–432                                                                                                                                                                                                              |
| Columbiformes | <i>Zenaidura macroura</i>                                             | LaPointe, D. Avipoxvirus. In CABI - Invasive Species Compendium. Publisher CAB International. Wallingford, UK, 2010.<br>www.cabi.org/isc.                                                                                                                                                                               |
| Cuculiformes  | <i>Chrysococcyx caprius</i>                                           | Bolte, <i>et al.</i> Avian host spectrum of avipoxviruses. <i>Avian Pathol</i> . <b>1999</b> , 28, 415–432                                                                                                                                                                                                              |
| Falconiformes | <i>Falco cherrug</i>                                                  | Bolte, <i>et al.</i> Avian host spectrum of avipoxviruses. <i>Avian Pathol</i> . <b>1999</b> , 28, 415–432                                                                                                                                                                                                              |
| Falconiformes | <i>Falco jugger</i>                                                   | Bolte, <i>et al.</i> Avian host spectrum of avipoxviruses. <i>Avian Pathol</i> . <b>1999</b> , 28, 415–432                                                                                                                                                                                                              |
| Falconiformes | <i>Falco peregrinus</i>                                               | Bolte, <i>et al.</i> Avian host spectrum of avipoxviruses. <i>Avian Pathol</i> . <b>1999</b> , 28, 415–432                                                                                                                                                                                                              |
| Falconiformes | <i>Falco rusticolus</i>                                               | Bolte, <i>et al.</i> Avian host spectrum of avipoxviruses. <i>Avian Pathol</i> . <b>1999</b> , 28, 415–432                                                                                                                                                                                                              |
| Falconiformes | <i>Falco tinnunculus</i>                                              | Bolte, <i>et al.</i> Avian host spectrum of avipoxviruses. <i>Avian Pathol</i> . <b>1999</b> , 28, 415–432                                                                                                                                                                                                              |
| Falconiformes | <i>Falco vespertinus</i>                                              | Gyuranecz, <i>et al.</i> Worldwide phylogenetic relationship of avian poxviruses. <i>J.Virol</i> . <b>2013</b> , 87, 4938–4951.<br>LaPointe, D. Avipoxvirus. In CABI - Invasive Species Compendium. Publisher CAB International. Wallingford, UK, 2010.<br>www.cabi.org/isc.                                            |
| Galliformes   | <i>Alectoris rufa</i>                                                 | Bolte, <i>et al.</i> Avian host spectrum of avipoxviruses. <i>Avian Pathol</i> . <b>1999</b> , 28, 415–432                                                                                                                                                                                                              |
| Galliformes   | <i>Bonasa umbellus</i>                                                | Bolte, <i>et al.</i> Avian host spectrum of avipoxviruses. <i>Avian Pathol</i> . <b>1999</b> , 28, 415–432                                                                                                                                                                                                              |
| Galliformes   | <i>Callipepla californica</i>                                         | Bolte, <i>et al.</i> Avian host spectrum of avipoxviruses. <i>Avian Pathol</i> . <b>1999</b> , 28, 415–432                                                                                                                                                                                                              |
| Galliformes   | <i>Callipepla gambelii</i>                                            | Bolte, <i>et al.</i> Avian host spectrum of avipoxviruses. <i>Avian Pathol</i> . <b>1999</b> , 28, 415–432                                                                                                                                                                                                              |
| Galliformes   | <i>Callipepla squamata</i>                                            | Bolte, <i>et al.</i> Avian host spectrum of avipoxviruses. <i>Avian Pathol</i> . <b>1999</b> , 28, 415–432                                                                                                                                                                                                              |
| Galliformes   | <i>Centrocercus urophasianus</i>                                      | Bolte, <i>et al.</i> Avian host spectrum of avipoxviruses. <i>Avian Pathol</i> . <b>1999</b> , 28, 415–432                                                                                                                                                                                                              |
| Galliformes   | <i>Chrysolophus pictus</i>                                            | Bolte, <i>et al.</i> Avian host spectrum of avipoxviruses. <i>Avian Pathol</i> . <b>1999</b> , 28, 415–432                                                                                                                                                                                                              |
| Galliformes   | <i>Colinus virginianus</i>                                            | Bolte, <i>et al.</i> Avian host spectrum of avipoxviruses. <i>Avian Pathol</i> . <b>1999</b> , 28, 415–432                                                                                                                                                                                                              |
| Galliformes   | <i>Coturnix coturnix</i>                                              | Bolte, <i>et al.</i> Avian host spectrum of avipoxviruses. <i>Avian Pathol</i> . <b>1999</b> , 28, 415–432<br>Manarolla, <i>et al.</i> Molecular biological characterization of avian poxvirus strains isolated from different avian species. <i>Vet.Microbiol</i> . <b>2010</b> , 140, 1-8.                            |
| Galliformes   | <i>Coturnix japonica</i>                                              | Bolte, <i>et al.</i> Avian host spectrum of avipoxviruses. <i>Avian Pathol</i> . <b>1999</b> , 28, 415–432                                                                                                                                                                                                              |
| Galliformes   | <i>Crossoptilon auritum</i>                                           | Bolte, <i>et al.</i> Avian host spectrum of avipoxviruses. <i>Avian Pathol</i> . <b>1999</b> , 28, 415–432                                                                                                                                                                                                              |
| Galliformes   | <i>Crossoptilon crossoptilon</i>                                      | Bolte, <i>et al.</i> Avian host spectrum of avipoxviruses. <i>Avian Pathol</i> . <b>1999</b> , 28, 415–432                                                                                                                                                                                                              |
| Galliformes   | <i>Dendragapus obscurus</i>                                           | Bolte, <i>et al.</i> Avian host spectrum of avipoxviruses. <i>Avian Pathol</i> . <b>1999</b> , 28, 415–432                                                                                                                                                                                                              |
| Galliformes   | <i>Gallus gallus</i>                                                  | Bolte, <i>et al.</i> Avian host spectrum of avipoxviruses. <i>Avian Pathol</i> . <b>1999</b> , 28, 415–432                                                                                                                                                                                                              |

|               |                                  |                                                                                                                                                                                  |
|---------------|----------------------------------|----------------------------------------------------------------------------------------------------------------------------------------------------------------------------------|
| Galliformes   | <i>Lagopus mutus</i>             | Bolte, <i>et al.</i> Avian host spectrum of avipoxviruses. <i>Avian Pathol.</i> <b>1999</b> , 28, 415–432                                                                        |
| Galliformes   | <i>Lophophorus impejanus</i>     | Bolte, <i>et al.</i> Avian host spectrum of avipoxviruses. <i>Avian Pathol.</i> <b>1999</b> , 28, 415–432                                                                        |
| Galliformes   | <i>Lophura diardi</i>            | Bolte, <i>et al.</i> Avian host spectrum of avipoxviruses. <i>Avian Pathol.</i> <b>1999</b> , 28, 415–432                                                                        |
|               |                                  | Nayeri Fasaee <i>et al.</i> Molecular detection and phylogenetic analysis of Avipoxvirus strains isolated from different bird species. <i>Iranian J.Vet.Res.</i> 2014, 15, 40-4. |
| Galliformes   | <i>Lophura mythemera</i>         | Gyuranecz, <i>et al.</i> Worldwide phylogenetic relationship of avian poxviruses. <i>J.Virol.</i> <b>2013</b> , 87, 4938–4951.                                                   |
| Galliformes   | <i>Lophura nycthemera</i>        | Bolte, <i>et al.</i> Avian host spectrum of avipoxviruses. <i>Avian Pathol.</i> <b>1999</b> , 28, 415–432                                                                        |
| Galliformes   | <i>Meleagris gallopavo</i>       | LaPointe, D. Avipoxvirus. In CABI - Invasive Species Compendium. Publisher CAB International. Wallingford, UK, 2010.                                                             |
|               |                                  | www.cabi.org/isc.                                                                                                                                                                |
| Galliformes   | <i>Numida meleagris</i>          | Bolte, <i>et al.</i> Avian host spectrum of avipoxviruses. <i>Avian Pathol.</i> <b>1999</b> , 28, 415–432                                                                        |
| Galliformes   | <i>Pavo cristatus</i>            | Bolte, <i>et al.</i> Avian host spectrum of avipoxviruses. <i>Avian Pathol.</i> <b>1999</b> , 28, 415–432                                                                        |
| Galliformes   | <i>Perdix perdix</i>             | Bolte, <i>et al.</i> Avian host spectrum of avipoxviruses. <i>Avian Pathol.</i> <b>1999</b> , 28, 415–432                                                                        |
| Galliformes   | <i>Phasianus colchicus</i>       | Bolte, <i>et al.</i> Avian host spectrum of avipoxviruses. <i>Avian Pathol.</i> <b>1999</b> , 28, 415–432                                                                        |
| Galliformes   | <i>Pternistis swainsonii</i>     | Van Niekerk & Verwoerd. Avian pox in Swainson's francolin in South Africa. <i>S.Afr.J.Anim.Sci.</i> <b>2002</b> , 32: 43-8.                                                      |
| Galliformes   | <i>Tetrao tetrix</i>             | Bolte, <i>et al.</i> Avian host spectrum of avipoxviruses. <i>Avian Pathol.</i> <b>1999</b> , 28, 415–432                                                                        |
| Galliformes   | <i>Tetrastes bonasia</i>         | Bolte, <i>et al.</i> Avian host spectrum of avipoxviruses. <i>Avian Pathol.</i> <b>1999</b> , 28, 415–432                                                                        |
| Galliformes   | <i>Tragopan satyra</i>           | Bolte, <i>et al.</i> Avian host spectrum of avipoxviruses. <i>Avian Pathol.</i> <b>1999</b> , 28, 415–432                                                                        |
| Galliformes   | <i>Tragopan temminckii</i>       | Bolte, <i>et al.</i> Avian host spectrum of avipoxviruses. <i>Avian Pathol.</i> <b>1999</b> , 28, 415–432                                                                        |
| Galliformes   | <i>Tympanuchus cupido</i>        | Bolte, <i>et al.</i> Avian host spectrum of avipoxviruses. <i>Avian Pathol.</i> <b>1999</b> , 28, 415–432                                                                        |
| Gruiformes    | <i>Fulica atra</i>               | Bolte, <i>et al.</i> Avian host spectrum of avipoxviruses. <i>Avian Pathol.</i> <b>1999</b> , 28, 415–432                                                                        |
| Gruiformes    | <i>Grus canadensis</i>           | Bolte, <i>et al.</i> Avian host spectrum of avipoxviruses. <i>Avian Pathol.</i> <b>1999</b> , 28, 415–432                                                                        |
| Gruiformes    | <i>Grus grus</i>                 | Bolte, <i>et al.</i> Avian host spectrum of avipoxviruses. <i>Avian Pathol.</i> <b>1999</b> , 28, 415–432                                                                        |
| Gruiformes    | <i>Grus japonensis</i>           | Bolte, <i>et al.</i> Avian host spectrum of avipoxviruses. <i>Avian Pathol.</i> <b>1999</b> , 28, 415–432                                                                        |
| Gruiformes    | <i>Grus virgo</i>                | Bolte, <i>et al.</i> Avian host spectrum of avipoxviruses. <i>Avian Pathol.</i> <b>1999</b> , 28, 415–432                                                                        |
| Otidiformes   | <i>Chlamydotis macqueenii</i>    | Bolte, <i>et al.</i> Avian host spectrum of avipoxviruses. <i>Avian Pathol.</i> <b>1999</b> , 28, 415–432                                                                        |
|               |                                  | LaPointe, D. Avipoxvirus. In CABI - Invasive Species Compendium. Publisher CAB International. Wallingford, UK, 2010.                                                             |
|               |                                  | www.cabi.org/isc.                                                                                                                                                                |
| Otidiformes   | <i>Chlamydotis undulata</i>      | Bolte, <i>et al.</i> Avian host spectrum of avipoxviruses. <i>Avian Pathol.</i> <b>1999</b> , 28, 415–432                                                                        |
| Otidiformes   | <i>Otis tarda</i>                | Hsieh, <i>et al.</i> Unusual pox lesions found in Chinese jungle mynahs ( <i>Acridotheres cristatellus</i> ). <i>Avian Pathol.</i> <b>2005</b> , 34, 415-7.                      |
| Passeriformes | <i>Acridotheres cristatellus</i> | LaPointe, D. Avipoxvirus. In CABI - Invasive Species Compendium. Publisher CAB International. Wallingford, UK, 2010.                                                             |
|               |                                  | www.cabi.org/isc.                                                                                                                                                                |
| Passeriformes | <i>Aimophila cassinii</i>        | Bolte, <i>et al.</i> Avian host spectrum of avipoxviruses. <i>Avian Pathol.</i> <b>1999</b> , 28, 415–432                                                                        |
| Passeriformes | <i>Alauda arvensis</i>           | LaPointe, D. Avipoxvirus. In CABI - Invasive Species Compendium. Publisher CAB International. Wallingford, UK, 2010.                                                             |
|               |                                  | www.cabi.org/isc.                                                                                                                                                                |
| Passeriformes | <i>Anthus berthelotii</i>        | Bolte, <i>et al.</i> Avian host spectrum of avipoxviruses. <i>Avian Pathol.</i> <b>1999</b> , 28, 415–432                                                                        |
| Passeriformes | <i>Anthus novaeseelandiae</i>    |                                                                                                                                                                                  |

|               |                                  |                                                                                                                                                                                                                           |
|---------------|----------------------------------|---------------------------------------------------------------------------------------------------------------------------------------------------------------------------------------------------------------------------|
| Passeriformes | <i>Baeolophus bicolor</i>        | Bolte, <i>et al.</i> Avian host spectrum of avipoxviruses. <i>Avian Pathol.</i> <b>1999</b> , 28, 415–432                                                                                                                 |
| Passeriformes | <i>Calandrella rufescens</i>     | LaPointe, D. Avipoxvirus. In CABI - Invasive Species Compendium. Publisher CAB International. Wallingford, UK, 2010.<br>www.cabi.org/isc.                                                                                 |
| Passeriformes | <i>Camarhynchus pallidus</i>     | Kleindorfer & Dudaniec. Increasing prevalence of avian poxvirus in Darwin's finches and its effect on male pairing success. <i>J.Avian Biol.</i> <b>2006</b> , 37, 69-76.                                                 |
| Passeriformes | <i>Camarhynchus parvulus</i>     | Kleindorfer & Dudaniec. Increasing prevalence of avian poxvirus in Darwin's finches and its effect on male pairing success. <i>J.Avian Biol.</i> <b>2006</b> , 37, 69-76.                                                 |
| Passeriformes | <i>Cardinalis cardinalis</i>     | Bolte, <i>et al.</i> Avian host spectrum of avipoxviruses. <i>Avian Pathol.</i> <b>1999</b> , 28, 415–432                                                                                                                 |
| Passeriformes | <i>Carduelis atrata</i>          | Gyuranecz, <i>et al.</i> Worldwide phylogenetic relationship of avian poxviruses. <i>J.Virol.</i> <b>2013</b> , 87, 4938–4951.                                                                                            |
| Passeriformes | <i>Carduelis carduelis</i>       | Bolte, <i>et al.</i> Avian host spectrum of avipoxviruses. <i>Avian Pathol.</i> <b>1999</b> , 28, 415–432                                                                                                                 |
| Passeriformes | <i>Catharus fuscescens</i>       | Bolte, <i>et al.</i> Avian host spectrum of avipoxviruses. <i>Avian Pathol.</i> <b>1999</b> , 28, 415–432                                                                                                                 |
| Passeriformes | <i>Catharus minimus</i>          | Bolte, <i>et al.</i> Avian host spectrum of avipoxviruses. <i>Avian Pathol.</i> <b>1999</b> , 28, 415–432                                                                                                                 |
| Passeriformes | <i>Catharus ustulatus</i>        | Bolte, <i>et al.</i> Avian host spectrum of avipoxviruses. <i>Avian Pathol.</i> <b>1999</b> , 28, 415–432                                                                                                                 |
| Passeriformes | <i>Certhia familiaris</i>        | Bolte, <i>et al.</i> Avian host spectrum of avipoxviruses. <i>Avian Pathol.</i> <b>1999</b> , 28, 415–432                                                                                                                 |
| Passeriformes | <i>Certhidea olivacea</i>        | Kleindorfer & Dudaniec. Increasing prevalence of avian poxvirus in Darwin's finches and its effect on male pairing success. <i>J.Avian Biol.</i> <b>2006</b> , 37, 69-76.                                                 |
| Passeriformes | <i>Chasiempis sandwichensis</i>  | LaPointe, D. Avipoxvirus. In CABI - Invasive Species Compendium. Publisher CAB International. Wallingford, UK, 2010.<br>www.cabi.org/isc.                                                                                 |
| Passeriformes | <i>Chloris chloris</i>           | Bolte, <i>et al.</i> Avian host spectrum of avipoxviruses. <i>Avian Pathol.</i> <b>1999</b> , 28, 415–432                                                                                                                 |
| Passeriformes | <i>Chloropsis aurifrons</i>      | Bolte, <i>et al.</i> Avian host spectrum of avipoxviruses. <i>Avian Pathol.</i> <b>1999</b> , 28, 415–432                                                                                                                 |
| Passeriformes | <i>Chlorospingus flavopectus</i> | Bolte, <i>et al.</i> Avian host spectrum of avipoxviruses. <i>Avian Pathol.</i> <b>1999</b> , 28, 415–432                                                                                                                 |
| Passeriformes | <i>Coloeus monedula</i>          | Bolte, <i>et al.</i> Avian host spectrum of avipoxviruses. <i>Avian Pathol.</i> <b>1999</b> , 28, 415–432                                                                                                                 |
| Passeriformes | <i>Copsychus malabaricus</i>     | Bolte, <i>et al.</i> Avian host spectrum of avipoxviruses. <i>Avian Pathol.</i> <b>1999</b> , 28, 415–432                                                                                                                 |
| Passeriformes | <i>Coracina novaehollandiae</i>  | Bolte, <i>et al.</i> Avian host spectrum of avipoxviruses. <i>Avian Pathol.</i> <b>1999</b> , 28, 415–432                                                                                                                 |
| Passeriformes | <i>Corvus brachyrhynchos</i>     | Gyuranecz, <i>et al.</i> Worldwide phylogenetic relationship of avian poxviruses. <i>J.Virol.</i> <b>2013</b> , 87, 4938–4951.                                                                                            |
| Passeriformes | <i>Corvus corax</i>              | Bolte, <i>et al.</i> Avian host spectrum of avipoxviruses. <i>Avian Pathol.</i> <b>1999</b> , 28, 415–432                                                                                                                 |
| Passeriformes | <i>Corvus cornix</i>             | Bolte, <i>et al.</i> Avian host spectrum of avipoxviruses. <i>Avian Pathol.</i> <b>1999</b> , 28, 415–432                                                                                                                 |
| Passeriformes | <i>Corvus corone</i>             | Bolte, <i>et al.</i> Avian host spectrum of avipoxviruses. <i>Avian Pathol.</i> <b>1999</b> , 28, 415–432                                                                                                                 |
| Passeriformes | <i>Corvus frugilegus</i>         | Bolte, <i>et al.</i> Avian host spectrum of avipoxviruses. <i>Avian Pathol.</i> <b>1999</b> , 28, 415–432                                                                                                                 |
| Passeriformes | <i>Corvus hawaiiensis</i>        | Bolte, <i>et al.</i> Avian host spectrum of avipoxviruses. <i>Avian Pathol.</i> <b>1999</b> , 28, 415–432                                                                                                                 |
| Passeriformes | <i>Corvus macrorhynchos</i>      | Fukui, <i>et al.</i> An epizootic of emerging novel avian pox in carrion crows ( <i>Corvus corone</i> ) and large-billed crows ( <i>Corvus macrorhynchos</i> ) in Japan. <i>J.Wildlife Dis.</i> <b>2016</b> . 52, 230-41. |
| Passeriformes | <i>Cotinga maculata</i>          | Bolte, <i>et al.</i> Avian host spectrum of avipoxviruses. <i>Avian Pathol.</i> <b>1999</b> , 28, 415–432                                                                                                                 |

|               |                               |                                                                                                                                                                                                                                 |
|---------------|-------------------------------|---------------------------------------------------------------------------------------------------------------------------------------------------------------------------------------------------------------------------------|
| Passeriformes | <i>Cracticus torquatus</i>    | Bennett & Gillett. Butcherbird polyomavirus isolated from a grey butcherbird ( <i>Cracticus torquatus</i> ) in Queensland, Australia. <i>Vet. Microbiol.</i> <b>2014</b> , 31, 168: 302-11.                                     |
| Passeriformes | <i>Cyanistes caeruleus</i>    | Williams, <i>et al.</i> Polymerase chain reaction detection of avipox and avian papillomavirus in naturally infected wild birds: comparisons of blood, swab and tissue samples. <i>Avian Pathol.</i> <b>2014</b> , 43, 130–134. |
| Passeriformes | <i>Cyanocitta cristata</i>    | Bolte, <i>et al.</i> Avian host spectrum of avipoxviruses. <i>Avian Pathol.</i> <b>1999</b> , 28, 415–432                                                                                                                       |
| Passeriformes | <i>Cyanocompsa brissonii</i>  | Bolte, <i>et al.</i> Avian host spectrum of avipoxviruses. <i>Avian Pathol.</i> <b>1999</b> , 28, 415–432                                                                                                                       |
| Passeriformes | <i>Cyanocompsa cyanoides</i>  | Bolte, <i>et al.</i> Avian host spectrum of avipoxviruses. <i>Avian Pathol.</i> <b>1999</b> , 28, 415–432                                                                                                                       |
| Passeriformes | <i>Cyanocorax yncas</i>       | Pérez-Tris <i>et al.</i> A multiplex PCR for detection of poxvirus and papillomavirus in cutaneous warts from live birds and museum skins. <i>Avian Dis.</i> <b>2011</b> , 55: 545-53.                                          |
| Passeriformes | <i>Dendroica petechia</i>     | LaPointe, D. Avipoxvirus. In CABI - Invasive Species Compendium. Publisher CAB International. Wallingford, UK, 2010. <a href="http://www.cabi.org/isc">www.cabi.org/isc</a> .                                                   |
| Passeriformes | <i>Dendroica tigrina</i>      | Bolte, <i>et al.</i> Avian host spectrum of avipoxviruses. <i>Avian Pathol.</i> <b>1999</b> , 28, 415–432                                                                                                                       |
| Passeriformes | <i>Drepanis coccinea</i>      | LaPointe, D. Avipoxvirus. In CABI - Invasive Species Compendium. Publisher CAB International. Wallingford, UK, 2010. <a href="http://www.cabi.org/isc">www.cabi.org/isc</a> .                                                   |
| Passeriformes | <i>Dumetella carolinensis</i> | Bolte, <i>et al.</i> Avian host spectrum of avipoxviruses. <i>Avian Pathol.</i> <b>1999</b> , 28, 415–432                                                                                                                       |
| Passeriformes | <i>Dysmorodrepanis munroi</i> | LaPointe, D. Avipoxvirus. In CABI - Invasive Species Compendium. Publisher CAB International. Wallingford, UK, 2010. <a href="http://www.cabi.org/isc">www.cabi.org/isc</a> .                                                   |
| Passeriformes | <i>Emberiza leucocephalos</i> | Pérez-Tris <i>et al.</i> A multiplex PCR for detection of poxvirus and papillomavirus in cutaneous warts from live birds and museum skins. <i>Avian Dis.</i> <b>2011</b> , 55: 545-53.                                          |
| Passeriformes | <i>Empidonax traillii</i>     | Bolte, <i>et al.</i> Avian host spectrum of avipoxviruses. <i>Avian Pathol.</i> <b>1999</b> , 28, 415–432                                                                                                                       |
| Passeriformes | <i>Erithacus rubecula</i>     | Williams, <i>et al.</i> Polymerase chain reaction detection of avipox and avian papillomavirus in naturally infected wild birds: comparisons of blood, swab and tissue samples. <i>Avian Pathol.</i> <b>2014</b> , 43, 130–134. |
| Passeriformes | <i>Eumyias thalassina</i>     | Bolte, <i>et al.</i> Avian host spectrum of avipoxviruses. <i>Avian Pathol.</i> <b>1999</b> , 28, 415–432                                                                                                                       |
| Passeriformes | <i>Euphonia musica</i>        | Pérez-Tris <i>et al.</i> A multiplex PCR for detection of poxvirus and papillomavirus in cutaneous warts from live birds and museum skins. <i>Avian Dis.</i> <b>2011</b> , 55: 545-53.                                          |
| Passeriformes | <i>Euphonia violacea</i>      | Bolte, <i>et al.</i> Avian host spectrum of avipoxviruses. <i>Avian Pathol.</i> <b>1999</b> , 28, 415–432                                                                                                                       |
| Passeriformes | <i>Fringilla coelebs</i>      | Bolte, <i>et al.</i> Avian host spectrum of avipoxviruses. <i>Avian Pathol.</i> <b>1999</b> , 28, 415–432                                                                                                                       |
| Passeriformes | <i>Galerida cristata</i>      | Bolte, <i>et al.</i> Avian host spectrum of avipoxviruses. <i>Avian Pathol.</i> <b>1999</b> , 28, 415–432                                                                                                                       |
| Passeriformes | <i>Geospiza fortis</i>        | Kleindorfer & Dudaniec. Increasing prevalence of avian poxvirus in Darwin's finches and its effect on male pairing success. <i>J. Avian Biol.</i> <b>2006</b> , 37, 69-76.                                                      |
| Passeriformes | <i>Geospiza fuliginosa</i>    | Gottdenker, <i>et al.</i> Causes of mortality of wild birds submitted to the Charles Darwin Research Station, Santa Cruz, Galápagos, Ecuador from 2002–2004. <i>J. Wildl. Dis.</i> <b>2008</b> , 44: 1024-31.                   |
| Passeriformes | <i>Geospiza scandens</i>      | Thiel, <i>et al.</i> Characterization of canarypox-like viruses infecting endemic birds in the Galápagos Islands. <i>J. Wildlife Dis.</i> <b>2005</b> , 41, 342-53.                                                             |



|               |                                |                                                                                                                                                                                                          |
|---------------|--------------------------------|----------------------------------------------------------------------------------------------------------------------------------------------------------------------------------------------------------|
| Passeriformes | <i>Geothlypis philadelphia</i> | Bolte, <i>et al.</i> Avian host spectrum of avipoxviruses. <i>Avian Pathol.</i> <b>1999</b> , 28, 415–432                                                                                                |
| Passeriformes | <i>Geothlypis trichas</i>      | Bolte, <i>et al.</i> Avian host spectrum of avipoxviruses. <i>Avian Pathol.</i> <b>1999</b> , 28, 415–432                                                                                                |
| Passeriformes | <i>Gnorimopsar chopi</i>       | Catroxo, <i>et al.</i> Detection of poxvirus using transmission electron microscopy techniques during outbreak in bay-winged cowbird ( <i>Gnorimopsar chopi</i> ). <i>INTECHOpen</i> , <b>2012</b> , 22. |
| Passeriformes | <i>Gracula religiosa</i>       | Bolte, <i>et al.</i> Avian host spectrum of avipoxviruses. <i>Avian Pathol.</i> <b>1999</b> , 28, 415–432                                                                                                |
| Passeriformes | <i>Grallina cyanoleuca</i>     | Bolte, <i>et al.</i> Avian host spectrum of avipoxviruses. <i>Avian Pathol.</i> <b>1999</b> , 28, 415–432                                                                                                |
| Passeriformes | <i>Grandala coelicolor</i>     | Bolte, <i>et al.</i> Avian host spectrum of avipoxviruses. <i>Avian Pathol.</i> <b>1999</b> , 28, 415–432                                                                                                |
| Passeriformes | <i>Gymnorhina tibicen</i>      | Bolte, <i>et al.</i> Avian host spectrum of avipoxviruses. <i>Avian Pathol.</i> <b>1999</b> , 28, 415–432                                                                                                |
| Passeriformes | <i>Haemorrhous mexicanus</i>   | Bolte, <i>et al.</i> Avian host spectrum of avipoxviruses. <i>Avian Pathol.</i> <b>1999</b> , 28, 415–432                                                                                                |
| Passeriformes | <i>Hemignathus obscurus</i>    | Bolte, <i>et al.</i> Avian host spectrum of avipoxviruses. <i>Avian Pathol.</i> <b>1999</b> , 28, 415–432                                                                                                |
| Passeriformes | <i>Hemignathus virens</i>      | Gyuranecz, <i>et al.</i> Worldwide phylogenetic relationship of avian poxviruses. <i>J.Virol.</i> <b>2013</b> , 87, 4938–4951.                                                                           |
| Passeriformes | <i>Himatione sanguinea</i>     | Bolte, <i>et al.</i> Avian host spectrum of avipoxviruses. <i>Avian Pathol.</i> <b>1999</b> , 28, 415–432                                                                                                |
| Passeriformes | <i>Hylocichla mustelina</i>    | Bolte, <i>et al.</i> Avian host spectrum of avipoxviruses. <i>Avian Pathol.</i> <b>1999</b> , 28, 415–432                                                                                                |
| Passeriformes | <i>Icteria virens</i>          | Bolte, <i>et al.</i> Avian host spectrum of avipoxviruses. <i>Avian Pathol.</i> <b>1999</b> , 28, 415–432                                                                                                |
| Passeriformes | <i>Junco hyemalis</i>          | Bolte, <i>et al.</i> Avian host spectrum of avipoxviruses. <i>Avian Pathol.</i> <b>1999</b> , 28, 415–432                                                                                                |
| Passeriformes | <i>Lamprotornis regius</i>     | Bolte, <i>et al.</i> Avian host spectrum of avipoxviruses. <i>Avian Pathol.</i> <b>1999</b> , 28, 415–432                                                                                                |
| Passeriformes | <i>Lanius sp.</i>              | LaPointe, D. Avipoxvirus. In CABI - Invasive Species Compendium. Publisher CAB International. Wallingford, UK, 2010. <a href="http://www.cabi.org/isc">www.cabi.org/isc</a> .                            |
| Passeriformes | <i>Leucopsar rothschildi</i>   | Landolt & Kocan. Transmission of avian pox from starlings to Rothchild' s Mynahs. <i>J.Wildlife Dis.</i> <b>1976</b> . 12, 353-356.                                                                      |
| Passeriformes | <i>Leucosticte tephrocotis</i> | LaPointe, D. Avipoxvirus. In CABI - Invasive Species Compendium. Publisher CAB International. Wallingford, UK, 2010. <a href="http://www.cabi.org/isc">www.cabi.org/isc</a> .                            |
| Passeriformes | <i>Linaria cannabina</i>       | Bolte, <i>et al.</i> Avian host spectrum of avipoxviruses. <i>Avian Pathol.</i> <b>1999</b> , 28, 415–432                                                                                                |
| Passeriformes | <i>Lonchura oryzivora</i>      | Bolte, <i>et al.</i> Avian host spectrum of avipoxviruses. <i>Avian Pathol.</i> <b>1999</b> , 28, 415–432                                                                                                |
| Passeriformes | <i>Loxia curvirostra</i>       | Pérez-Tris <i>et al.</i> A multiplex PCR for detection of poxvirus and papillomavirus in cutaneous warts from live birds and museum skins. <i>Avian Dis.</i> <b>2011</b> , 55: 545-53.                   |
| Passeriformes | <i>Loxioides bailleui</i>      | Weli & Tryland. Avipoxviruses: infection biology and their use as vaccine vectors. <i>Virol.</i> <b>2011</b> , 8, 1-5.                                                                                   |
| Passeriformes | <i>Loxops coccineus</i>        | LaPointe, D. Avipoxvirus. In CABI - Invasive Species Compendium. Publisher CAB International. Wallingford, UK, 2010. <a href="http://www.cabi.org/isc">www.cabi.org/isc</a> .                            |
| Passeriformes | <i>Manacus manacus</i>         | Bolte, <i>et al.</i> Avian host spectrum of avipoxviruses. <i>Avian Pathol.</i> <b>1999</b> , 28, 415–432                                                                                                |
| Passeriformes | <i>Manacus vitellinus</i>      | LaPointe, D. Avipoxvirus. In CABI - Invasive Species Compendium. Publisher CAB International. Wallingford, UK, 2010. <a href="http://www.cabi.org/isc">www.cabi.org/isc</a> .                            |
| Passeriformes | <i>Melospiza melodia</i>       | Bolte, <i>et al.</i> Avian host spectrum of avipoxviruses. <i>Avian Pathol.</i> <b>1999</b> , 28, 415–432                                                                                                |
| Passeriformes | <i>Mimus parvulus</i>          | LaPointe, D. Avipoxvirus. In CABI - Invasive Species Compendium. Publisher CAB International. Wallingford, UK, 2010. <a href="http://www.cabi.org/isc">www.cabi.org/isc</a> .                            |

|               |                                  |                                                                                                                                                                                                                                                                                                                                                                                                                    |
|---------------|----------------------------------|--------------------------------------------------------------------------------------------------------------------------------------------------------------------------------------------------------------------------------------------------------------------------------------------------------------------------------------------------------------------------------------------------------------------|
| Passeriformes | <i>Mimus polyglottos</i>         | Bolte, <i>et al.</i> Avian host spectrum of avipoxviruses. <i>Avian Pathol.</i> <b>1999</b> , 28, 415–432                                                                                                                                                                                                                                                                                                          |
| Passeriformes | <i>Molothrus ater</i>            | Bolte, <i>et al.</i> Avian host spectrum of avipoxviruses. <i>Avian Pathol.</i> <b>1999</b> , 28, 415–432                                                                                                                                                                                                                                                                                                          |
| Passeriformes | <i>Myadestes obscurus</i>        | LaPointe, D. Avipoxvirus. In CABI - Invasive Species Compendium. Publisher CAB International. Wallingford, UK, 2010.<br>www.cabi.org/isc.                                                                                                                                                                                                                                                                          |
| Passeriformes | <i>Myadestes palmeri</i>         | LaPointe, D. Avipoxvirus. In CABI - Invasive Species Compendium. Publisher CAB International. Wallingford, UK, 2010.<br>www.cabi.org/isc.                                                                                                                                                                                                                                                                          |
| Passeriformes | <i>Oryzoborus angolensis</i>     | Bolte, <i>et al.</i> Avian host spectrum of avipoxviruses. <i>Avian Pathol.</i> <b>1999</b> , 28, 415–432                                                                                                                                                                                                                                                                                                          |
| Passeriformes | <i>Oryzoborus crassirostris</i>  | Suepaul, <i>et al.</i> Novel poxviral infection in three finch species illegally imported into Trinidad, West Indies, with implications for native birds. <i>J.Zoo Wildlife Med.</i> <b>2019</b> , 50: 231-7.<br>Catroxo, <i>et al.</i> Identification of poxvirus under transmission electron microscopy during outbreak period in wild birds, in São Paulo, Brazil. <i>Int.J.Morphol.</i> <b>2009</b> , 1;27, 2. |
| Passeriformes | <i>Paroaria dominicana</i>       | Bolte, <i>et al.</i> Avian host spectrum of avipoxviruses. <i>Avian Pathol.</i> <b>1999</b> , 28, 415–432                                                                                                                                                                                                                                                                                                          |
| Passeriformes | <i>Paroreomyza maculata</i>      | Bolte, <i>et al.</i> Avian host spectrum of avipoxviruses. <i>Avian Pathol.</i> <b>1999</b> , 28, 415–432                                                                                                                                                                                                                                                                                                          |
| Passeriformes | <i>Parus major</i>               | Pérez-Tris <i>et al.</i> A multiplex PCR for detection of poxvirus and papillomavirus in cutaneous warts from live birds and museum skins. <i>Avian Dis.</i> <b>2011</b> , 55: 545-53.                                                                                                                                                                                                                             |
| Passeriformes | <i>Passer afer</i>               | Bolte, <i>et al.</i> Avian host spectrum of avipoxviruses. <i>Avian Pathol.</i> <b>1999</b> , 28, 415–432                                                                                                                                                                                                                                                                                                          |
| Passeriformes | <i>Passer domesticus</i>         | Pérez-Tris <i>et al.</i> A multiplex PCR for detection of poxvirus and papillomavirus in cutaneous warts from live birds and museum skins. <i>Avian Dis.</i> <b>2011</b> , 55: 545-53.                                                                                                                                                                                                                             |
| Passeriformes | <i>Passer griseus</i>            | LaPointe, D. Avipoxvirus. In CABI - Invasive Species Compendium. Publisher CAB International. Wallingford, UK, 2010.<br>www.cabi.org/isc.                                                                                                                                                                                                                                                                          |
| Passeriformes | <i>Passer melanurus</i>          | LaPointe, D. Avipoxvirus. In CABI - Invasive Species Compendium. Publisher CAB International. Wallingford, UK, 2010.<br>www.cabi.org/isc.                                                                                                                                                                                                                                                                          |
| Passeriformes | <i>Passer montanus</i>           | LaPointe, D. Avipoxvirus. In CABI - Invasive Species Compendium. Publisher CAB International. Wallingford, UK, 2010.<br>www.cabi.org/isc.                                                                                                                                                                                                                                                                          |
| Passeriformes | <i>Passerculus sandwichensis</i> | LaPointe, D. Avipoxvirus. In CABI - Invasive Species Compendium. Publisher CAB International. Wallingford, UK, 2010.<br>www.cabi.org/isc.                                                                                                                                                                                                                                                                          |
| Passeriformes | <i>Passerella iliaca</i>         | Bolte, <i>et al.</i> Avian host spectrum of avipoxviruses. <i>Avian Pathol.</i> <b>1999</b> , 28, 415–432                                                                                                                                                                                                                                                                                                          |
| Passeriformes | <i>Periparus ater</i>            | Pérez-Tris <i>et al.</i> A multiplex PCR for detection of poxvirus and papillomavirus in cutaneous warts from live birds and museum skins. <i>Avian Dis.</i> <b>2011</b> , 55: 545-53.                                                                                                                                                                                                                             |
| Passeriformes | <i>Petroica longipes</i>         | Ha, <i>et al.</i> The phylogenetic analysis of avipoxvirus in New Zealand. <i>Vet microbiol.</i> <b>2011</b> , 12: 80-7.                                                                                                                                                                                                                                                                                           |
| Passeriformes | <i>Petroica traversi</i>         | Ha, <i>et al.</i> The phylogenetic analysis of avipoxvirus in New Zealand. <i>Vet microbiol.</i> <b>2011</b> , 12: 80-7.                                                                                                                                                                                                                                                                                           |
| Passeriformes | <i>Philesturnus carunculatus</i> | Alley <i>et al.</i> Concurrent avian malaria and avipox virus infection in translocated South Island saddlebacks ( <i>Philesturnus carunculatus carunculatus</i> ). <i>N.Z.Vet.J.</i> <b>2010</b> , 58, 218-23.                                                                                                                                                                                                    |
| Passeriformes | <i>Philesturnus rufusater</i>    | Ha, <i>et al.</i> The phylogenetic analysis of avipoxvirus in New Zealand. <i>Vet microbiol.</i> <b>2011</b> , 12: 80-7.                                                                                                                                                                                                                                                                                           |
| Passeriformes | <i>Pica hudsonia</i>             | Gyuranecz, <i>et al.</i> Worldwide phylogenetic relationship of avian poxviruses. <i>J.Virol.</i> <b>2013</b> , 87, 4938–4951.                                                                                                                                                                                                                                                                                     |
| Passeriformes | <i>Pica pica</i>                 | Bolte, <i>et al.</i> Avian host spectrum of avipoxviruses. <i>Avian Pathol.</i> <b>1999</b> , 28, 415–432                                                                                                                                                                                                                                                                                                          |

|               |                                 |                                                                                                                                                                                                                                   |
|---------------|---------------------------------|-----------------------------------------------------------------------------------------------------------------------------------------------------------------------------------------------------------------------------------|
| Passeriformes | <i>Pipilo chlorurus</i>         | Bolte, <i>et al.</i> Avian host spectrum of avipoxviruses. <i>Avian Pathol.</i> <b>1999</b> , 28, 415–432                                                                                                                         |
| Passeriformes | <i>Pipilo erythrophthalmus</i>  | Bolte, <i>et al.</i> Avian host spectrum of avipoxviruses. <i>Avian Pathol.</i> <b>1999</b> , 28, 415–432                                                                                                                         |
| Passeriformes | <i>Pipra erythrocephala</i>     | Bolte, <i>et al.</i> Avian host spectrum of avipoxviruses. <i>Avian Pathol.</i> <b>1999</b> , 28, 415–432                                                                                                                         |
| Passeriformes | <i>Pipra mentalis</i>           | Bolte, <i>et al.</i> Avian host spectrum of avipoxviruses. <i>Avian Pathol.</i> <b>1999</b> , 28, 415–432                                                                                                                         |
| Passeriformes | <i>Piranga rubra</i>            | Bolte, <i>et al.</i> Avian host spectrum of avipoxviruses. <i>Avian Pathol.</i> <b>1999</b> , 28, 415–432                                                                                                                         |
| Passeriformes | <i>Platyspiza crassirostris</i> | Gottdenker, <i>et al.</i> Causes of mortality of wild birds submitted to the Charles Darwin Research Station, Santa Cruz, Galápagos, Ecuador from 2002–2004. <i>J.Wildl.Dis.</i> <b>2008</b> , 44: 1024-31.                       |
| Passeriformes | <i>Platyspiza crassirostris</i> | Suepaul, <i>et al.</i> Novel poxviral infection in three finch species illegally imported into Trinidad, West Indies, with implications for native birds. <i>J.Zoo Wildlife Med.</i> <b>2019</b> , 50: 231-7.                     |
| Passeriformes | <i>Plectrophenax nivalis</i>    | Bolte, <i>et al.</i> Avian host spectrum of avipoxviruses. <i>Avian Pathol.</i> <b>1999</b> , 28, 415–432                                                                                                                         |
| Passeriformes | <i>Ploceus velatus</i>          | LaPointe, D. Avipoxvirus. In CABI - Invasive Species Compendium. Publisher CAB International. Wallingford, UK, 2010.<br>www.cabi.org/isc.                                                                                         |
| Passeriformes | <i>Poecile atricapillus</i>     | Vana <i>et al.</i> Variation in seroprevalence of antibodies against <i>Mycoplasma gallisepticum</i> and Avipoxvirus in nine species of birds with differential access to feeders. <i>Avian Biol.Res.</i> <b>2018</b> , 11, 7-11. |
| Passeriformes | <i>Polioptila caerulea</i>      | Adams <i>et al.</i> Phylogenetic analysis of avian poxviruses among free-ranging birds of Virginia. <i>Avian diseases.</i> <b>2005</b> , 49: 601–605.                                                                             |
| Passeriformes | <i>Prunella collaris</i>        | Bolte, <i>et al.</i> Avian host spectrum of avipoxviruses. <i>Avian Pathol.</i> <b>1999</b> , 28, 415–432                                                                                                                         |
| Passeriformes | <i>Prunella modularis</i>       | Bolte, <i>et al.</i> Avian host spectrum of avipoxviruses. <i>Avian Pathol.</i> <b>1999</b> , 28, 415–432                                                                                                                         |
| Passeriformes | <i>Pyrrhula erythaca</i>        | Bolte, <i>et al.</i> Avian host spectrum of avipoxviruses. <i>Avian Pathol.</i> <b>1999</b> , 28, 415–432                                                                                                                         |
| Passeriformes | <i>Pyrrhula pyrrhula</i>        | Bolte, <i>et al.</i> Avian host spectrum of avipoxviruses. <i>Avian Pathol.</i> <b>1999</b> , 28, 415–432                                                                                                                         |
| Passeriformes | <i>Quelea quelea</i>            | LaPointe, D. Avipoxvirus. In CABI - Invasive Species Compendium. Publisher CAB International. Wallingford, UK, 2010.<br>www.cabi.org/isc.                                                                                         |
| Passeriformes | <i>Quiscalus major</i>          | Gyuranecz, <i>et al.</i> Worldwide phylogenetic relationship of avian poxviruses. <i>J.Virol.</i> <b>2013</b> , 87, 4938–4951.                                                                                                    |
| Passeriformes | <i>Quiscalus quiscula</i>       | Bolte, <i>et al.</i> Avian host spectrum of avipoxviruses. <i>Avian Pathol.</i> <b>1999</b> , 28, 415–432                                                                                                                         |
| Passeriformes | <i>Quiscalus versicolor</i>     | Bolte, <i>et al.</i> Avian host spectrum of avipoxviruses. <i>Avian Pathol.</i> <b>1999</b> , 28, 415–432                                                                                                                         |
| Passeriformes | <i>Rhodacanthis sp.</i>         | LaPointe, D. Avipoxvirus. In CABI - Invasive Species Compendium. Publisher CAB International. Wallingford, UK, 2010.<br>www.cabi.org/isc.                                                                                         |
| Passeriformes | <i>Seiurus aurocapillus</i>     | Bolte, <i>et al.</i> Avian host spectrum of avipoxviruses. <i>Avian Pathol.</i> <b>1999</b> , 28, 415–432                                                                                                                         |
| Passeriformes | <i>Seiurus motacilla</i>        | Bolte, <i>et al.</i> Avian host spectrum of avipoxviruses. <i>Avian Pathol.</i> <b>1999</b> , 28, 415–432                                                                                                                         |
| Passeriformes | <i>Serinus canaria</i>          | Bolte, <i>et al.</i> Avian host spectrum of avipoxviruses. <i>Avian Pathol.</i> <b>1999</b> , 28, 415–432                                                                                                                         |
| Passeriformes | <i>Serinus serinus</i>          | Senar, <i>et al.</i> Multi-state analysis of the impacts of avian pox on a population of Serins ( <i>Serinus serinus</i> ): the importance of estimating recapture rates. <i>Anim.Biodivers.Cons.</i> <b>2004</b> , 27, 133-46.   |
| Passeriformes | <i>Sicalis flaveola</i>         | Bolte, <i>et al.</i> Avian host spectrum of avipoxviruses. <i>Avian Pathol.</i> <b>1999</b> , 28, 415–432                                                                                                                         |
| Passeriformes | <i>Spinus cucullatus</i>        | Bolte, <i>et al.</i> Avian host spectrum of avipoxviruses. <i>Avian Pathol.</i> <b>1999</b> , 28, 415–432                                                                                                                         |

|               |                                |                                                                                                                                                                                                   |
|---------------|--------------------------------|---------------------------------------------------------------------------------------------------------------------------------------------------------------------------------------------------|
| Passeriformes | <i>Spinus pinus</i>            | LaPointe, D. Avipoxvirus. In CABI - Invasive Species Compendium. Publisher CAB International. Wallingford, UK, 2010. <a href="http://www.cabi.org/isc">www.cabi.org/isc</a> .                     |
| Passeriformes | <i>Spinus spinus</i>           | Bolte, <i>et al.</i> Avian host spectrum of avipoxviruses. <i>Avian Pathol.</i> <b>1999</b> , 28, 415–432                                                                                         |
| Passeriformes | <i>Spizella arborea</i>        | Bolte, <i>et al.</i> Avian host spectrum of avipoxviruses. <i>Avian Pathol.</i> <b>1999</b> , 28, 415–432                                                                                         |
| Passeriformes | <i>Spizella passerina</i>      | Bolte, <i>et al.</i> Avian host spectrum of avipoxviruses. <i>Avian Pathol.</i> <b>1999</b> , 28, 415–432                                                                                         |
| Passeriformes | <i>Spizella pusilla</i>        | Bolte, <i>et al.</i> Avian host spectrum of avipoxviruses. <i>Avian Pathol.</i> <b>1999</b> , 28, 415–432                                                                                         |
| Passeriformes | <i>Sporophila albogularis</i>  | Catroxo, <i>et al.</i> Identification of poxvirus under transmission electron microscopy during outbreak period in wild birds, in São Paulo, Brazil. <i>Int.J.Morphol.</i> <b>2009</b> , 1;27, 2. |
| Passeriformes | <i>Sporophila americana</i>    | Bolte, <i>et al.</i> Avian host spectrum of avipoxviruses. <i>Avian Pathol.</i> <b>1999</b> , 28, 415–432                                                                                         |
| Passeriformes | <i>Sporophila caerulea</i>     | Catroxo, <i>et al.</i> Identification of poxvirus under transmission electron microscopy during outbreak period in wild birds, in São Paulo, Brazil. <i>Int.J.Morphol.</i> <b>2009</b> , 1;27, 2. |
| Passeriformes | <i>Sturnus vulgaris</i>        | Bolte, <i>et al.</i> Avian host spectrum of avipoxviruses. <i>Avian Pathol.</i> <b>1999</b> , 28, 415–432                                                                                         |
| Passeriformes | <i>Sylvia atricapilla</i>      | LaPointe, D. Avipoxvirus. In CABI - Invasive Species Compendium. Publisher CAB International. Wallingford, UK, 2010. <a href="http://www.cabi.org/isc">www.cabi.org/isc</a> .                     |
| Passeriformes | <i>Sylvia curruca</i>          | Bolte, <i>et al.</i> Avian host spectrum of avipoxviruses. <i>Avian Pathol.</i> <b>1999</b> , 28, 415–432                                                                                         |
| Passeriformes | <i>Tangara guttata</i>         | Bolte, <i>et al.</i> Avian host spectrum of avipoxviruses. <i>Avian Pathol.</i> <b>1999</b> , 28, 415–432                                                                                         |
| Passeriformes | <i>Tarsiger cyanurus</i>       | Gong, <i>et al.</i> Molecular Phylogeny of an Avipoxvirus Isolated from Red-Flanked Blue Robin in China. <i>Avian Dis.</i> <b>2020</b> . 64: 2-6.                                                 |
| Passeriformes | <i>Telespiza cantans</i>       | LaPointe, D. Avipoxvirus. In CABI - Invasive Species Compendium. Publisher CAB International. Wallingford, UK, 2010. <a href="http://www.cabi.org/isc">www.cabi.org/isc</a> .                     |
| Passeriformes | <i>Thraupis episcopus</i>      | Bolte, <i>et al.</i> Avian host spectrum of avipoxviruses. <i>Avian Pathol.</i> <b>1999</b> , 28, 415–432                                                                                         |
| Passeriformes | <i>Troglodytes troglodytes</i> | Bolte, <i>et al.</i> Avian host spectrum of avipoxviruses. <i>Avian Pathol.</i> <b>1999</b> , 28, 415–432                                                                                         |
| Passeriformes | <i>Turdus merula</i>           | Bolte, <i>et al.</i> Avian host spectrum of avipoxviruses. <i>Avian Pathol.</i> <b>1999</b> , 28, 415–432                                                                                         |
| Passeriformes | <i>Turdus migratorius</i>      | Bolte, <i>et al.</i> Avian host spectrum of avipoxviruses. <i>Avian Pathol.</i> <b>1999</b> , 28, 415–432                                                                                         |
| Passeriformes | <i>Turdus nudigensis</i>       | Bolte, <i>et al.</i> Avian host spectrum of avipoxviruses. <i>Avian Pathol.</i> <b>1999</b> , 28, 415–432                                                                                         |
| Passeriformes | <i>Turdus olivaceus</i>        | Offerman, <i>et al.</i> Phylogenetic and histological variation in avipoxviruses isolated in South Africa. <i>J.Gen.Virol.</i> <b>2013</b> , 94, 2338.                                            |
| Passeriformes | <i>Turdus philomelos</i>       | Bolte, <i>et al.</i> Avian host spectrum of avipoxviruses. <i>Avian Pathol.</i> <b>1999</b> , 28, 415–432                                                                                         |
| Passeriformes | <i>Turdus pilaris</i>          | Bolte, <i>et al.</i> Avian host spectrum of avipoxviruses. <i>Avian Pathol.</i> <b>1999</b> , 28, 415–432                                                                                         |
| Passeriformes | <i>Turdus viscivorus</i>       | Bolte, <i>et al.</i> Avian host spectrum of avipoxviruses. <i>Avian Pathol.</i> <b>1999</b> , 28, 415–432                                                                                         |
| Passeriformes | <i>Vestiaria coccinea</i>      | Farias, <i>et al.</i> Taqman real-time PCR detects Avipoxvirus DNA in blood of Hawaii Amakihi ( <i>Hemignathus virens</i> ). <i>PLoS ONE.</i> <b>2010</b> , 27, e10745.                           |
| Passeriformes | <i>Zonotrichia albicollis</i>  | Bolte, <i>et al.</i> Avian host spectrum of avipoxviruses. <i>Avian Pathol.</i> <b>1999</b> , 28, 415–432                                                                                         |
| Passeriformes | <i>Zonotrichia atricapilla</i> | Bolte, <i>et al.</i> Avian host spectrum of avipoxviruses. <i>Avian Pathol.</i> <b>1999</b> , 28, 415–432                                                                                         |
| Passeriformes | <i>Zonotrichia leucophrys</i>  | Bolte, <i>et al.</i> Avian host spectrum of avipoxviruses. <i>Avian Pathol.</i> <b>1999</b> , 28, 415–432                                                                                         |

|                     |                                    |                                                                                                                                                                                                                                                                 |
|---------------------|------------------------------------|-----------------------------------------------------------------------------------------------------------------------------------------------------------------------------------------------------------------------------------------------------------------|
| Passeriformes       | <i>Zosterops japonicus</i>         | LaPointe, D. Avipoxvirus. In CABI - Invasive Species Compendium. Publisher CAB International. Wallingford, UK, 2010. <a href="http://www.cabi.org/isc">www.cabi.org/isc</a> .                                                                                   |
| Passeriformes       | <i>Zosterops lateralis</i>         | Bolte, <i>et al.</i> Avian host spectrum of avipoxviruses. <i>Avian Pathol.</i> <b>1999</b> , 28, 415–432                                                                                                                                                       |
| Passeriformes       | <i>Zosterops palpebrosus</i>       | Bolte, <i>et al.</i> Avian host spectrum of avipoxviruses. <i>Avian Pathol.</i> <b>1999</b> , 28, 415–432                                                                                                                                                       |
|                     |                                    | Pesaro, <i>et al.</i> Squamous cell carcinoma with presence of poxvirus-like inclusions in the foot of a pink-backed pelican ( <i>Pelecanus rufescens</i> ). <i>Avian Pathol.</i> <b>2009</b> , 1, 38: 229–31.                                                  |
| Pelecaniformes      | <i>Pelecanus rufescens</i>         |                                                                                                                                                                                                                                                                 |
| Pelecaniformes      | <i>Phalacrocorax bougainvillii</i> | Bolte, <i>et al.</i> Avian host spectrum of avipoxviruses. <i>Avian Pathol.</i> <b>1999</b> , 28, 415–432                                                                                                                                                       |
| Pelecaniformes      | <i>Phalacrocorax capillatus</i>    | Kurihara <i>et al.</i> Avipoxvirus infection in two captive Japanese cormorants ( <i>Phalacrocorax capillatus</i> ). <i>J.Vet.Med.Sci.</i> <b>2020</b> , 19, 0406.                                                                                              |
| Pelecaniformes      | <i>Phalacrocorax pelagicus</i>     | Gyuranecz, <i>et al.</i> Worldwide phylogenetic relationship of avian poxviruses. <i>J.Virol.</i> <b>2013</b> , 87, 4938–4951.                                                                                                                                  |
| Piciformes          | <i>Colaptes auratus</i>            | Bolte, <i>et al.</i> Avian host spectrum of avipoxviruses. <i>Avian Pathol.</i> <b>1999</b> , 28, 415–432                                                                                                                                                       |
|                     |                                    | Vana <i>et al.</i> Variation in seroprevalence of antibodies against <i>Mycoplasma gallisepticum</i> and Avipoxvirus in nine species of birds with differential access to feeders. <i>Avian Biol.Res.</i> <b>2018</b> , 11, 7–11.                               |
| Piciformes          | <i>Melanerpes carolinus</i>        | Vana <i>et al.</i> Variation in seroprevalence of antibodies against <i>Mycoplasma gallisepticum</i> and Avipoxvirus in nine species of birds with differential access to feeders. <i>Avian Biol.Res.</i> <b>2018</b> , 11, 7–11.                               |
| Piciformes          | <i>Picoides pubescens</i>          | Bolte, <i>et al.</i> Avian host spectrum of avipoxviruses. <i>Avian Pathol.</i> <b>1999</b> , 28, 415–432                                                                                                                                                       |
| Podicipediformes    | <i>Phaethon lepturus</i>           | Bolte, <i>et al.</i> Avian host spectrum of avipoxviruses. <i>Avian Pathol.</i> <b>1999</b> , 28, 415–432                                                                                                                                                       |
| Podicipediformes    | <i>Phaethon rubricauda</i>         | LaPointe, D. Avipoxvirus. In CABI - Invasive Species Compendium. Publisher CAB International. Wallingford, UK, 2010. <a href="http://www.cabi.org/isc">www.cabi.org/isc</a> .                                                                                   |
| Phoenicopteriformes | <i>Phoenicopterus chilensis</i>    | Carulei, <i>et al.</i> Comparative analysis of avian poxvirus genomes, including a novel poxvirus from lesser flamingos ( <i>Phoenicopterus minor</i> ), highlights the lack of conservation of the central region. <i>BMC Genomics.</i> <b>2017</b> , 18: 1–3. |
| Phoenicopteriformes | <i>Phoenicopterus minor</i>        |                                                                                                                                                                                                                                                                 |
| Phoenicopteriformes | <i>Phoenicopterus roseus</i>       | Terasaki, <i>et al.</i> Avian poxvirus infection in flamingos ( <i>Phoenicopterus roseus</i> ) in a zoo in Japan. <i>Avian Dis.</i> <b>2010</b> , 54: 955–7.                                                                                                    |
| Phoenicopteriformes | <i>Phoenicopterus ruber</i>        | Henriques, <i>et al.</i> Avian poxvirus infection in a flamingo ( <i>Phoenicopterus ruber</i> ) of the Lisbon zoo. <i>J.Zoo Wildlife Med.</i> <b>2016</b> , 47: 161–74.                                                                                         |
| Podicipediformes    | <i>Podiceps cristatus</i>          | Bolte, <i>et al.</i> Avian host spectrum of avipoxviruses. <i>Avian Pathol.</i> <b>1999</b> , 28, 415–432                                                                                                                                                       |
|                     |                                    | Sarker, <i>et al.</i> Genomic Characterisation of a Novel Avipoxvirus Isolated from an Endangered Yellow-Eyed Penguin ( <i>Megadyptes antipodes</i> ). <i>Viruses.</i> <b>2021</b> , 13, 194.                                                                   |
| Procellariiformes   | <i>Ardenna carneipes</i>           | Sarker, <i>et al.</i> Genomic Characterisation of a Novel Avipoxvirus Isolated from an Endangered Yellow-Eyed Penguin ( <i>Megadyptes antipodes</i> ). <i>Viruses.</i> <b>2021</b> , 13, 194.                                                                   |
| Procellariiformes   | <i>Ardenna pacificus</i>           | Schoombie, <i>et al.</i> Avian pox in seabirds on Marion Island, southern Indian Ocean. 2018.                                                                                                                                                                   |
| Procellariiformes   | <i>Diomedea exulans</i>            | Bolte, <i>et al.</i> Avian host spectrum of avipoxviruses. <i>Avian Pathol.</i> <b>1999</b> , 28, 415–432                                                                                                                                                       |
| Procellariiformes   | <i>Diomedea immutabilis</i>        | LaPointe, D. Avipoxvirus. In CABI - Invasive Species Compendium. Publisher CAB International. Wallingford, UK, 2010. <a href="http://www.cabi.org/isc">www.cabi.org/isc</a> .                                                                                   |
| Procellariiformes   | <i>Diomedea melanophris</i>        | LaPointe, D. Avipoxvirus. In CABI - Invasive Species Compendium. Publisher CAB International. Wallingford, UK, 2010. <a href="http://www.cabi.org/isc">www.cabi.org/isc</a> .                                                                                   |
| Procellariiformes   | <i>Macronectes giganteus</i>       |                                                                                                                                                                                                                                                                 |

|                   |                                          |                                                                                                                                                                                                                |
|-------------------|------------------------------------------|----------------------------------------------------------------------------------------------------------------------------------------------------------------------------------------------------------------|
| Procellariiformes | <i>Phoebastria irrorata</i>              | Tompkins, <i>et al.</i> Avian Pox discovered in the critically endangered Waved Albatross ( <i>Phoebastria irrorata</i> ) from the Galápagos Islands, Ecuador. <i>J.Wildlife Dis.</i> <b>2017</b> , 53, 891-5. |
| Procellariiformes | <i>Procellaria parkinsoni</i>            | Uhart, <i>et al.</i> Review of diseases (pathogen isolation, direct recovery and antibodies) in albatrosses and large petrels worldwide. <i>Bird Conserv.Int.</i> <b>2018</b> , 28: 169-96.                    |
| Procellariiformes | <i>Puffinus lherminieri</i>              | Gottdenker, <i>et al.</i> Causes of mortality of wild birds submitted to the Charles Darwin Research Station, Santa Cruz, Galápagos, Ecuador from 2002–2004. <i>J.Wildl.Dis.</i> <b>2008</b> , 44: 1024-31.    |
| Procellariiformes | <i>Puffinus puffinus</i>                 | Bolte, <i>et al.</i> Avian host spectrum of avipoxviruses. <i>Avian Pathol.</i> <b>1999</b> , 28, 415–432                                                                                                      |
| Procellariiformes | <i>Thalassarche cauta</i>                | Uhart, <i>et al.</i> Review of diseases (pathogen isolation, direct recovery and antibodies) in albatrosses and large petrels worldwide. <i>Bird Conserv.Int.</i> <b>2018</b> , 28: 169-96.                    |
| Procellariiformes | <i>Thalassarche melanophris</i>          | Uhart, <i>et al.</i> Review of diseases (pathogen isolation, direct recovery and antibodies) in albatrosses and large petrels worldwide. <i>Bird Conserv.Int.</i> <b>2018</b> , 28: 169-96.                    |
| Psittaciformes    | <i>Agapornis fischeri</i>                | Bolte, <i>et al.</i> Avian host spectrum of avipoxviruses. <i>Avian Pathol.</i> <b>1999</b> , 28, 415–432                                                                                                      |
| Psittaciformes    | <i>Agapornis personatus</i>              | Bolte, <i>et al.</i> Avian host spectrum of avipoxviruses. <i>Avian Pathol.</i> <b>1999</b> , 28, 415–432                                                                                                      |
| Psittaciformes    | <i>Agapornis roseicollis</i>             | Bolte, <i>et al.</i> Avian host spectrum of avipoxviruses. <i>Avian Pathol.</i> <b>1999</b> , 28, 415–432                                                                                                      |
| Psittaciformes    | <i>Amazona aestiva</i>                   | Bolte, <i>et al.</i> Avian host spectrum of avipoxviruses. <i>Avian Pathol.</i> <b>1999</b> , 28, 415–432                                                                                                      |
| Psittaciformes    | <i>Amazona albifrons</i>                 | Bolte, <i>et al.</i> Avian host spectrum of avipoxviruses. <i>Avian Pathol.</i> <b>1999</b> , 28, 415–432                                                                                                      |
| Psittaciformes    | <i>Amazona autumnalis</i>                | Bolte, <i>et al.</i> Avian host spectrum of avipoxviruses. <i>Avian Pathol.</i> <b>1999</b> , 28, 415–432                                                                                                      |
| Psittaciformes    | <i>Amazona farinosa</i>                  | Bolte, <i>et al.</i> Avian host spectrum of avipoxviruses. <i>Avian Pathol.</i> <b>1999</b> , 28, 415–432                                                                                                      |
| Psittaciformes    | <i>Amazona finschi</i>                   | Bolte, <i>et al.</i> Avian host spectrum of avipoxviruses. <i>Avian Pathol.</i> <b>1999</b> , 28, 415–432                                                                                                      |
| Psittaciformes    | <i>Amazona ochrocephala</i>              | Bolte, <i>et al.</i> Avian host spectrum of avipoxviruses. <i>Avian Pathol.</i> <b>1999</b> , 28, 415–432                                                                                                      |
| Psittaciformes    | <i>Amazona ochrocephala auropalliata</i> | Bolte, <i>et al.</i> Avian host spectrum of avipoxviruses. <i>Avian Pathol.</i> <b>1999</b> , 28, 415–432                                                                                                      |
| Psittaciformes    | <i>Amazona vinacea</i>                   | Saidenberg, <i>et al.</i> Health-screening protocols for vinaceous amazons ( <i>Amazona vinacea</i> ) in a reintroduction project. <i>J.Zoo Wildlife Med.</i> <b>2015</b> . 46, 704-12.                        |
| Psittaciformes    | <i>Anodorhynchus hyacinthinus</i>        | Bolte, <i>et al.</i> Avian host spectrum of avipoxviruses. <i>Avian Pathol.</i> <b>1999</b> , 28, 415–432                                                                                                      |
| Psittaciformes    | <i>Aprosmictus erythropterus</i>         | Bolte, <i>et al.</i> Avian host spectrum of avipoxviruses. <i>Avian Pathol.</i> <b>1999</b> , 28, 415–432                                                                                                      |
| Psittaciformes    | <i>Ara ararauna</i>                      | Bolte, <i>et al.</i> Avian host spectrum of avipoxviruses. <i>Avian Pathol.</i> <b>1999</b> , 28, 415–432                                                                                                      |
| Psittaciformes    | <i>Ara chloroptera</i>                   | Bolte, <i>et al.</i> Avian host spectrum of avipoxviruses. <i>Avian Pathol.</i> <b>1999</b> , 28, 415–432                                                                                                      |
| Psittaciformes    | <i>Ara militaris mexicana</i>            | Bolte, <i>et al.</i> Avian host spectrum of avipoxviruses. <i>Avian Pathol.</i> <b>1999</b> , 28, 415–432                                                                                                      |
| Psittaciformes    | <i>Ara rubrogenys</i>                    | Bolte, <i>et al.</i> Avian host spectrum of avipoxviruses. <i>Avian Pathol.</i> <b>1999</b> , 28, 415–432                                                                                                      |
| Psittaciformes    | <i>Aratinga solstitialis</i>             | Bolte, <i>et al.</i> Avian host spectrum of avipoxviruses. <i>Avian Pathol.</i> <b>1999</b> , 28, 415–432                                                                                                      |
| Psittaciformes    | <i>Brotogeris pyrrhoptera</i>            | Bolte, <i>et al.</i> Avian host spectrum of avipoxviruses. <i>Avian Pathol.</i> <b>1999</b> , 28, 415–432                                                                                                      |
| Psittaciformes    | <i>Deroptyus accipitrinus</i>            | Bolte, <i>et al.</i> Avian host spectrum of avipoxviruses. <i>Avian Pathol.</i> <b>1999</b> , 28, 415–432                                                                                                      |
| Psittaciformes    | <i>Enicognathus leptorhynchus</i>        | Bolte, <i>et al.</i> Avian host spectrum of avipoxviruses. <i>Avian Pathol.</i> <b>1999</b> , 28, 415–432                                                                                                      |

|                 |                                |                                                                                                                                                                                                             |
|-----------------|--------------------------------|-------------------------------------------------------------------------------------------------------------------------------------------------------------------------------------------------------------|
| Psittaciformes  | <i>Eupsittula canicularis</i>  | Bolte, <i>et al.</i> Avian host spectrum of avipoxviruses. <i>Avian Pathol.</i> <b>1999</b> , 28, 415–432                                                                                                   |
| Psittaciformes  | <i>Loriculus vernalis</i>      | Bolte, <i>et al.</i> Avian host spectrum of avipoxviruses. <i>Avian Pathol.</i> <b>1999</b> , 28, 415–432                                                                                                   |
| Psittaciformes  | <i>Melopsittacus undulatus</i> | Bolte, <i>et al.</i> Avian host spectrum of avipoxviruses. <i>Avian Pathol.</i> <b>1999</b> , 28, 415–432                                                                                                   |
| Psittaciformes  | <i>Neopsephotus bourkii</i>    | González-Hein, <i>et al.</i> Case report: an avian pox outbreak in captive psittacine birds in Chile. <i>J.Exotic Pet Med.</i> <b>2008</b> , 17: 210-5.                                                     |
| Psittaciformes  | <i>Nymphicus hollandicus</i>   | Bolte, <i>et al.</i> Avian host spectrum of avipoxviruses. <i>Avian Pathol.</i> <b>1999</b> , 28, 415–432                                                                                                   |
| Psittaciformes  | <i>Pionites melanocephala</i>  | Bolte, <i>et al.</i> Avian host spectrum of avipoxviruses. <i>Avian Pathol.</i> <b>1999</b> , 28, 415–432                                                                                                   |
| Psittaciformes  | <i>Pionus fuscus</i>           | Bolte, <i>et al.</i> Avian host spectrum of avipoxviruses. <i>Avian Pathol.</i> <b>1999</b> , 28, 415–432                                                                                                   |
| Psittaciformes  | <i>Pionus maximiliani</i>      | Bolte, <i>et al.</i> Avian host spectrum of avipoxviruses. <i>Avian Pathol.</i> <b>1999</b> , 28, 415–432                                                                                                   |
| Psittaciformes  | <i>Pionus menstruus</i>        | Bolte, <i>et al.</i> Avian host spectrum of avipoxviruses. <i>Avian Pathol.</i> <b>1999</b> , 28, 415–432                                                                                                   |
|                 |                                | LaPointe, D. Avipoxvirus. In CABI - Invasive Species Compendium. Publisher CAB International. Wallingford, UK, 2010. <a href="http://www.cabi.org/isc">www.cabi.org/isc</a> .                               |
| Psittaciformes  | <i>Pionus senilis</i>          | Bolte, <i>et al.</i> Avian host spectrum of avipoxviruses. <i>Avian Pathol.</i> <b>1999</b> , 28, 415–432                                                                                                   |
| Psittaciformes  | <i>Pionus seniloides</i>       | Murer, <i>et al.</i> Identification and phylogenetic analysis of clade C Avipoxvirus in a fowlpox outbreak in exotic psittacines in southern Brazil. <i>J. Vet. Diag. Invest.</i> <b>2018</b> , 30, 946-50. |
| Psittaciformes  | <i>Platycercus elegans</i>     | Bolte, <i>et al.</i> Avian host spectrum of avipoxviruses. <i>Avian Pathol.</i> <b>1999</b> , 28, 415–432                                                                                                   |
| Psittaciformes  | <i>Platycercus eximius</i>     | Gyuranecz, <i>et al.</i> Worldwide phylogenetic relationship of avian poxviruses. <i>J.Virol.</i> <b>2013</b> , 87, 4938–4951.                                                                              |
| Psittaciformes  | <i>Polytelis alexandrae</i>    | Slocombe, <i>et al.</i> Avian pox in crimson rosellas ( <i>Platycercus elegans</i> ) in southern Australia. <i>Avian Pathol.</i> <b>2013</b> , 1, 42: 147-50.                                               |
| Psittaciformes  | <i>Polytelis swainsonii</i>    | Bolte, <i>et al.</i> Avian host spectrum of avipoxviruses. <i>Avian Pathol.</i> <b>1999</b> , 28, 415–432                                                                                                   |
| Psittaciformes  | <i>Psephotus haematonotus</i>  | Beaufrière <i>et al.</i> What is your diagnosis? Avian poxvirus. <i>J.Avian Med.Surg.</i> <b>2009</b> , 23: 325–8.                                                                                          |
| Psittaciformes  | <i>Psephotus haematonotus</i>  | Bolte, <i>et al.</i> Avian host spectrum of avipoxviruses. <i>Avian Pathol.</i> <b>1999</b> , 28, 415–432                                                                                                   |
| Psittaciformes  | <i>Psittacara holochlora</i>   | Bolte, <i>et al.</i> Avian host spectrum of avipoxviruses. <i>Avian Pathol.</i> <b>1999</b> , 28, 415–432                                                                                                   |
| Psittaciformes  | <i>Psittacara mitrata</i>      | Bolte, <i>et al.</i> Avian host spectrum of avipoxviruses. <i>Avian Pathol.</i> <b>1999</b> , 28, 415–432                                                                                                   |
| Rheiformes      | <i>Rhea americana</i>          | Bolte, <i>et al.</i> Avian host spectrum of avipoxviruses. <i>Avian Pathol.</i> <b>1999</b> , 28, 415–432                                                                                                   |
|                 |                                | Sarker, <i>et al.</i> Genomic Characterisation of a Novel Avipoxvirus Isolated from an Endangered Yellow-Eyed Penguin ( <i>Megadyptes antipodes</i> ). <i>Viruses.</i> <b>2021</b> , 13, 194.               |
| Sphenisciformes | <i>Megadyptes antipodes</i>    | LaPointe, D. Avipoxvirus. In CABI - Invasive Species Compendium. Publisher CAB International. Wallingford, UK, 2010. <a href="http://www.cabi.org/isc">www.cabi.org/isc</a> .                               |
| Sphenisciformes | <i>Pygoscelis papua</i>        | Bolte, <i>et al.</i> Avian host spectrum of avipoxviruses. <i>Avian Pathol.</i> <b>1999</b> , 28, 415–432                                                                                                   |
| Sphenisciformes | <i>Spheniscus demersus</i>     | Bolte, <i>et al.</i> Avian host spectrum of avipoxviruses. <i>Avian Pathol.</i> <b>1999</b> , 28, 415–432                                                                                                   |
| Sphenisciformes | <i>Spheniscus humboldti</i>    | Kane, <i>et al.</i> Avian pox in Magellanic Penguins ( <i>Spheniscus magellanicus</i> ). <i>J. Wildl. Dis.</i> <b>2012</b> , 48, 790–794.                                                                   |
| Sphenisciformes | <i>Spheniscus megallanicus</i> | Bolte, <i>et al.</i> Avian host spectrum of avipoxviruses. <i>Avian Pathol.</i> <b>1999</b> , 28, 415–432                                                                                                   |
| Strigiformes    | <i>Asio otus</i>               | Bolte, <i>et al.</i> Avian host spectrum of avipoxviruses. <i>Avian Pathol.</i> <b>1999</b> , 28, 415–432                                                                                                   |
| Strigiformes    | <i>Bubo bubo</i>               | Bolte, <i>et al.</i> Avian host spectrum of avipoxviruses. <i>Avian Pathol.</i> <b>1999</b> , 28, 415–432                                                                                                   |
|                 |                                | LaPointe, D. Avipoxvirus. In CABI - Invasive Species Compendium. Publisher CAB International. Wallingford, UK, 2010. <a href="http://www.cabi.org/isc">www.cabi.org/isc</a> .                               |
| Strigiformes    | <i>Bubo virginianus</i>        |                                                                                                                                                                                                             |

|                  |                         |                                                                                                                                                                                |
|------------------|-------------------------|--------------------------------------------------------------------------------------------------------------------------------------------------------------------------------|
| Strigiformes     | <i>Megascops asio</i>   | LaPointe, D. Avipoxvirus. In CABI - Invasive Species Compendium. Publisher CAB International. Wallingford, UK, 2010.<br>www.cabi.org/isc.                                      |
| Strigiformes     | <i>Strix varia</i>      | Bolte, <i>et al.</i> Avian host spectrum of avipoxviruses. <i>Avian Pathol.</i> <b>1999</b> , 28, 415–432                                                                      |
| Strigiformes     | <i>Tyto alba</i>        | Vargas, <i>et al.</i> Avian pox virus infection in a common barn owl ( <i>Tyto alba</i> ) in southern Brazil. <i>Pesquisa Veterinária Brasileira.</i> <b>2011</b> , 31, 620-2. |
| Struthioniformes | <i>Struthio camelus</i> | Bolte, <i>et al.</i> Avian host spectrum of avipoxviruses. <i>Avian Pathol.</i> <b>1999</b> , 28, 415–432                                                                      |

---
