# Supplementary material
Source: MDPI journal article supplement (https://www.mdpi.com/2036-7481/12/2/28)
Supplement: s1 [file s1]

**Table S3.** Prevalence of avian poxvirus outbreaks in captive birds.

| ORDER           | SPECIES                         | COMMON NAME               | FACILITY                   | SAMPLE      |               |               | LOCATION, COUNTRY | PERIOD    | REFERENCE                  |
|-----------------|---------------------------------|---------------------------|----------------------------|-------------|---------------|---------------|-------------------|-----------|----------------------------|
|                 |                                 |                           |                            | SIZE        | PREVALENCE    | MORTALITY (%) |                   |           |                            |
| Anseriformes    | <i>Anas platyrhynchos</i>       | Domestic mallard duck     | Farm                       | 50          | 5-70          | 0             | Guangxi, China    | 2013-2014 | Zheng et al., 2015         |
| Charadriiformes | <i>Burhinus oedicnemus</i>      | Captive stone curlew      | Farm                       | 165         | 100           | 0             | Abu Dhabi, UAE    | ND        | Lierz et al., 2007         |
| Passeriformes   | <i>Leucosticte tephrocotis</i>  | Gray-crowned rosy finch   | Aviary                     | 16          | 75            | 75            | Washington, USA   | 2001      | Hukkanen et al., 2003      |
| Falconiformes   | <i>Falco</i> spp.               | Falcon species            | Hunting birds              | 46, 46      | 2.5 (2.3-2.7) | 3.3           | Kuwait, UAE       | 2003-2006 | Tarello et al., 2008       |
| Otidiformes     | <i>Chlamydotis undulata</i>     | Houbara bustard           | Captive- breeding programs | 160335      | 1.4 (0.8-3.7) | ND            | Morocco,          | 2006-2013 | Le Loc'h et al., 2016      |
|                 | <i>Chlamydotis macqueenii</i>   |                           |                            |             |               |               | UAE               |           |                            |
|                 | <i>Chlamydotis undulata</i>     |                           |                            |             |               |               |                   |           |                            |
| Otidiformes     | <i>Chlamydotis macqueenii</i>   | Houbara bustard           | Aviary                     | 123         | ND???         | ND???         | Bahrain, Kuwait   | 1992      | Samour et al., 1996        |
| Psittaciformes  | Several (7 spp)                 | Parrot species            | Aviary                     |             | 26.6          | 22            | Chile             | 2004      | Gonzalez-Hein et al., 2008 |
| Psittaciformes  | Several (10 spp)                | Parrot species            | Aviary                     |             | 28.7          | 3.2           | ND, Brazil        | 2015      | Esteves et al., 2017       |
|                 | <i>Serinus canaria</i>          | Canary                    |                            |             |               |               |                   |           |                            |
| Passeriformes   | <i>Passer domesticus</i>        | House sparrow             | Research aviary            | 235 and 120 | 68.1 and 2.5  | 40 and 2.5    | ND, USA           | 1982      | Donnelly & Crane, 1985     |
| Passeriformes   | <i>Leucopsar rothchildii</i>    | Rothchild's mynah         | Aviary                     |             | 40            | 16.6          | Washington, USA   | 1974      | Landolt & Kocan, 1976      |
|                 | <i>Zonotrichia leucophrys</i>   | White-crowned sparrow     |                            |             |               |               |                   |           |                            |
|                 | <i>Zonotrichia atricapilla</i>  | Golden-crowned sparrow    |                            |             |               |               |                   |           |                            |
| Passeriformes   | <i>Passer domesticus</i>        | House sparrow             | Research aviary            |             | 69.20         | 11.1          | Washington, USA   | 1969      | Giddens et al., 1971       |
| Passeriformes   | <i>Serinus canaria</i>          | Canary                    | Aviary                     | 450         | >57           | >65           | California, USA   | 2009      | Shivaprasad et al., 2009   |
| Passeriformes   | <i>Serinus canaria</i>          | Canary                    | Aviary                     | 200         | 82.5          | 87.9          |                   |           | Johnson and Castro, 1986   |
|                 | <i>Paroaria dominicana</i>      | Cowled cardinal           |                            |             |               |               |                   |           |                            |
|                 | <i>Sporophila caerulescens</i>  | White-throated seedeater  |                            |             |               |               |                   |           |                            |
| Passeriformes   | <i>Sporophila albogularis</i>   | Double-collared seedeater | Recovery center            |             | 62.5          | ??            | Sao Paulo, Brazil | 2003      | Catroxo et al., 2009       |
| Galliformes     | <i>Pavus cristatus</i>          | Peacock                   | Zoological Park            | 60          | 75            | 0             | Baghdad, Iraq     | 1978      | Falluji et al., 1979       |
| Columbiformes   | <i>Columbia livia domestica</i> | Racing pigeon             | Aviary                     | 30          | 0.40          | 25            | Hisar, India      | 1997      | Chauhan et al., 1998       |
